# Supplementary material for: Synthesis and Antimicrobial Activity of 4-Substituted 1,2,3-Triazole-Coumarin Derivatives
Source: PubMed Central journal article supplement (PMC6017388; doi:10.3390/molecules23010199), 2018-01-18

## Supporting Information

### Synthesis and antimicrobial activity of 4-substituted 1,2,3-triazole-coumarin derivatives

Priscila López-Rojas,<sup>1</sup> Monika Janeczko,<sup>2</sup> Konrad Kubiński,<sup>2</sup> Ángel Amesty,<sup>1,\*</sup> Maciej Masłyk<sup>2\*</sup>, Ana Estévez-Braun<sup>1,\*</sup>

<sup>1</sup>*Instituto Universitario de Bio-Orgánica Antonio González (CIBICAN), Departamento de Química Orgánica, Universidad de La Laguna, Spain*

<sup>2</sup>*Department of Molecular Biology, The John Paul II Catholic University of Lublin, Poland*

### Contents

<sup>1</sup>HNMR and <sup>13</sup>CNMR spectra of compounds **6**, **8a-8m** and **9a-9m**

**<sup>1</sup>H-NMR (CDCl<sub>3</sub>, 500 MHz) of compound 6.**

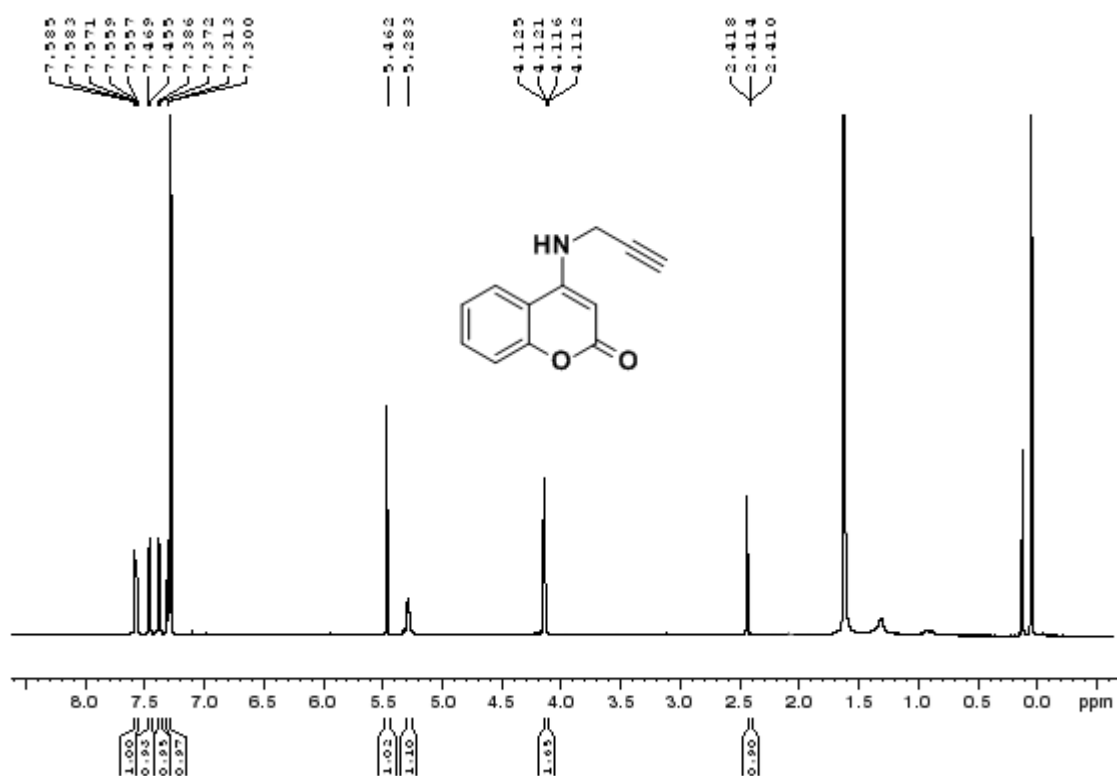

**<sup>13</sup>C-NMR (CDCl<sub>3</sub>, 125 MHz) of compound 6.**

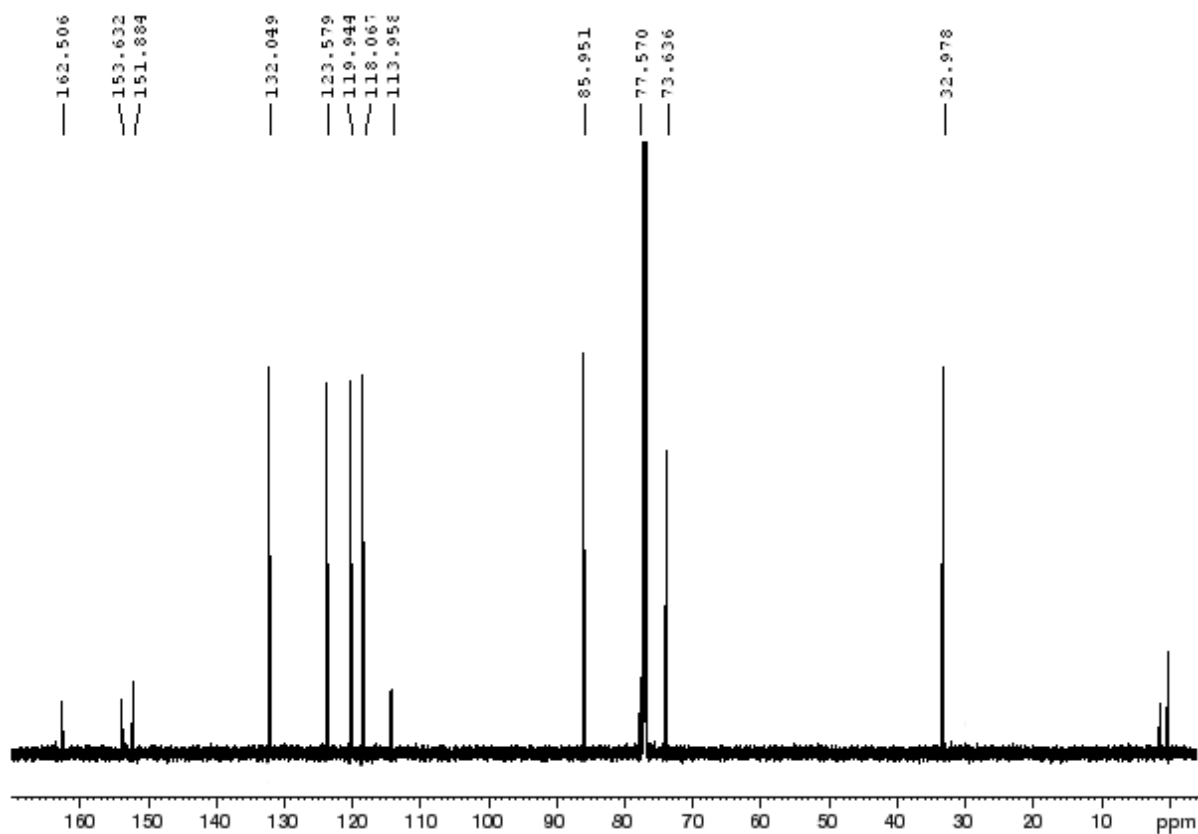

**<sup>1</sup>H-NMR ((CD<sub>3</sub>)<sub>2</sub>SO, 500 MHz) of compound 8a.**

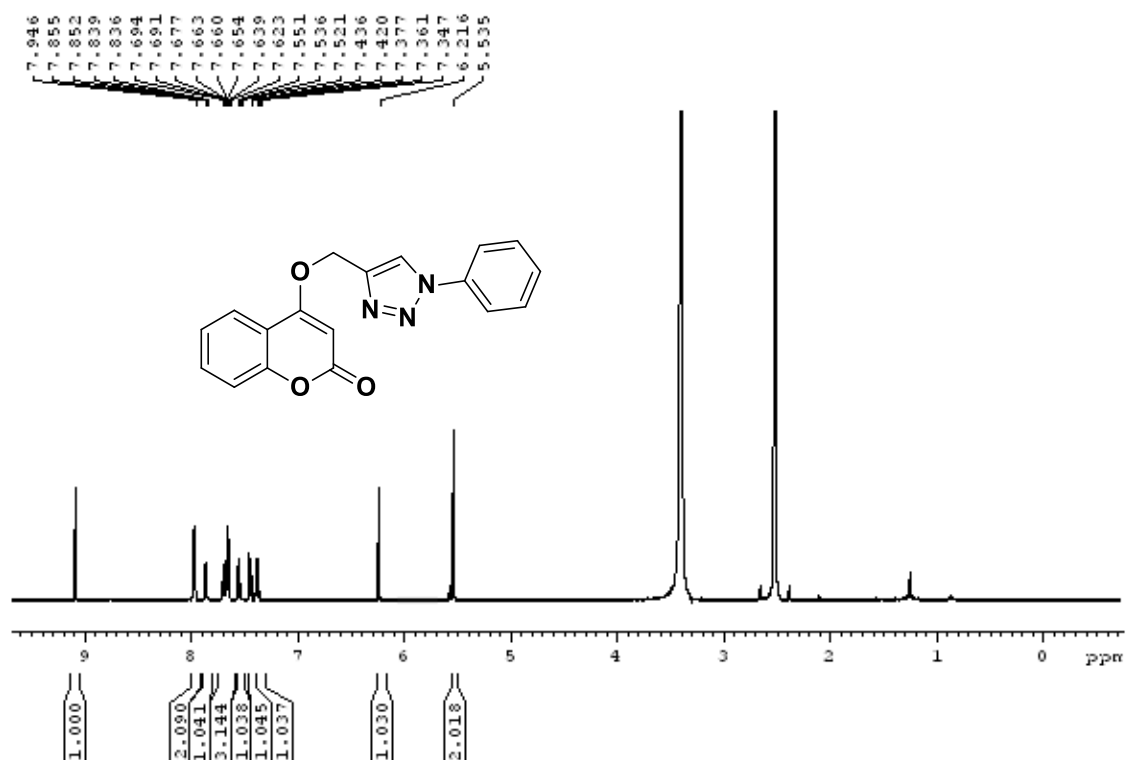

**<sup>13</sup>C-NMR ((CD<sub>3</sub>)<sub>2</sub>SO, 125 MHz) of compound 8a.**

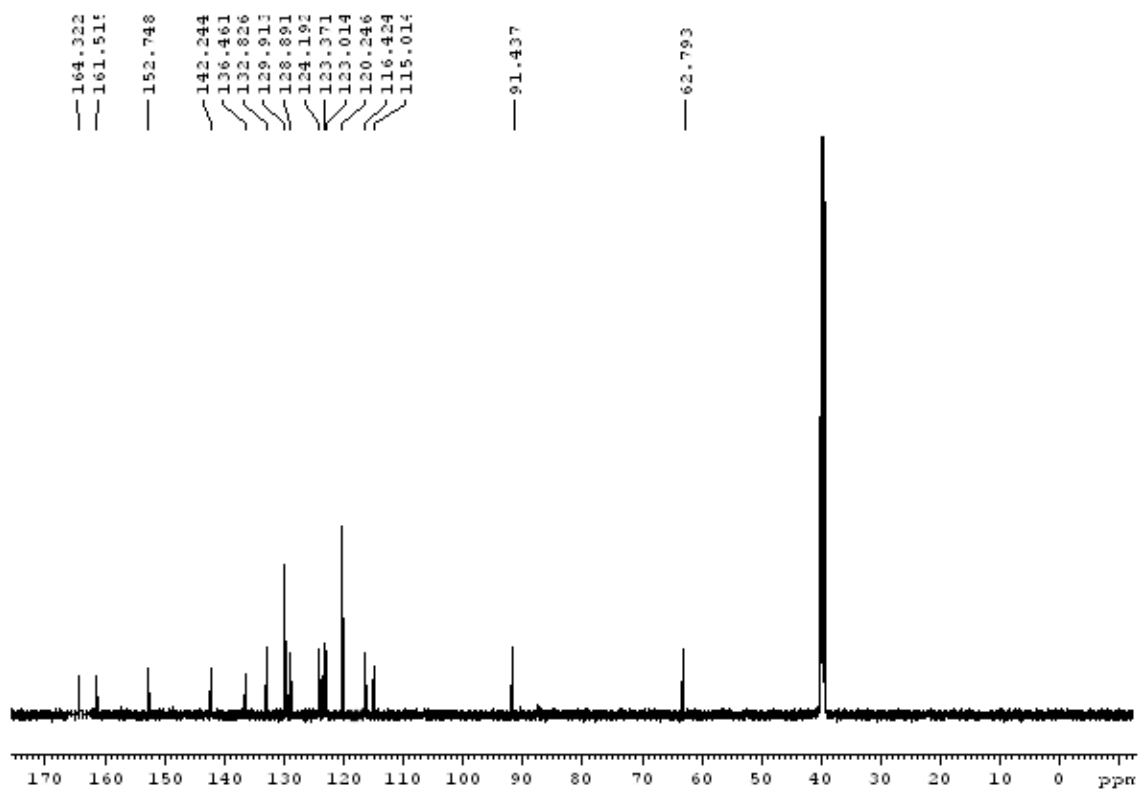

**<sup>1</sup>H-NMR (CDCl<sub>3</sub>, 500 MHz) of compound 8b.**

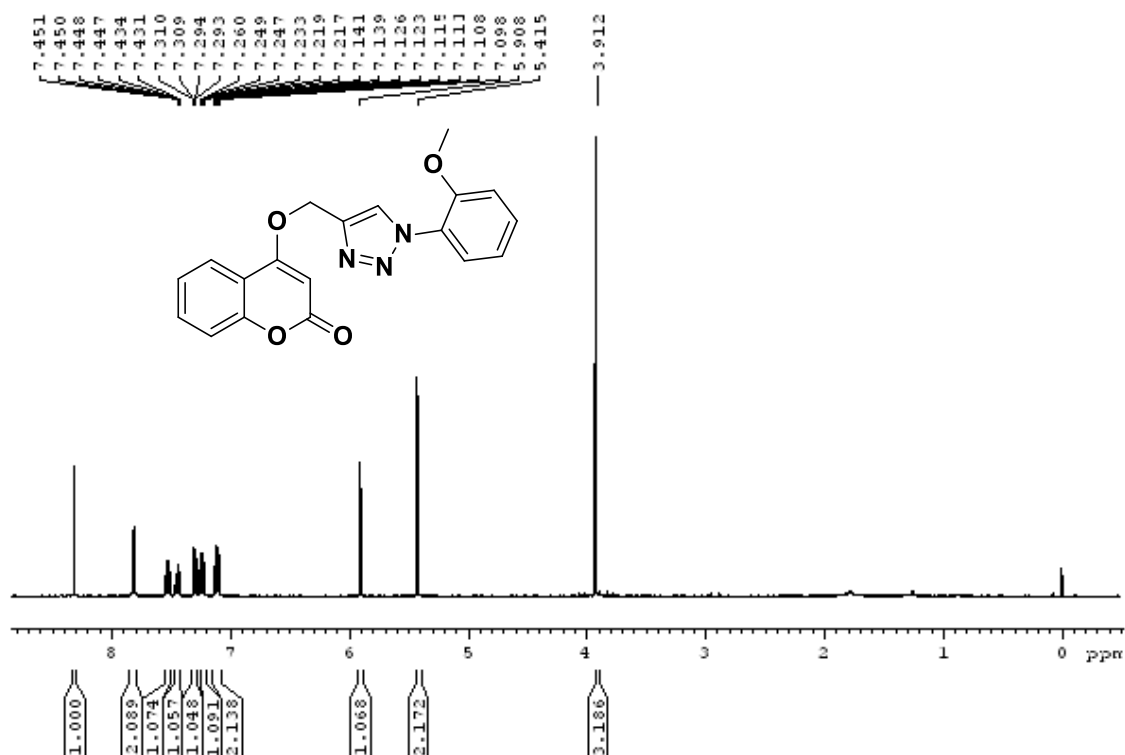

**<sup>13</sup>C-NMR (CDCl<sub>3</sub>, 125 MHz) of compound 8b.**

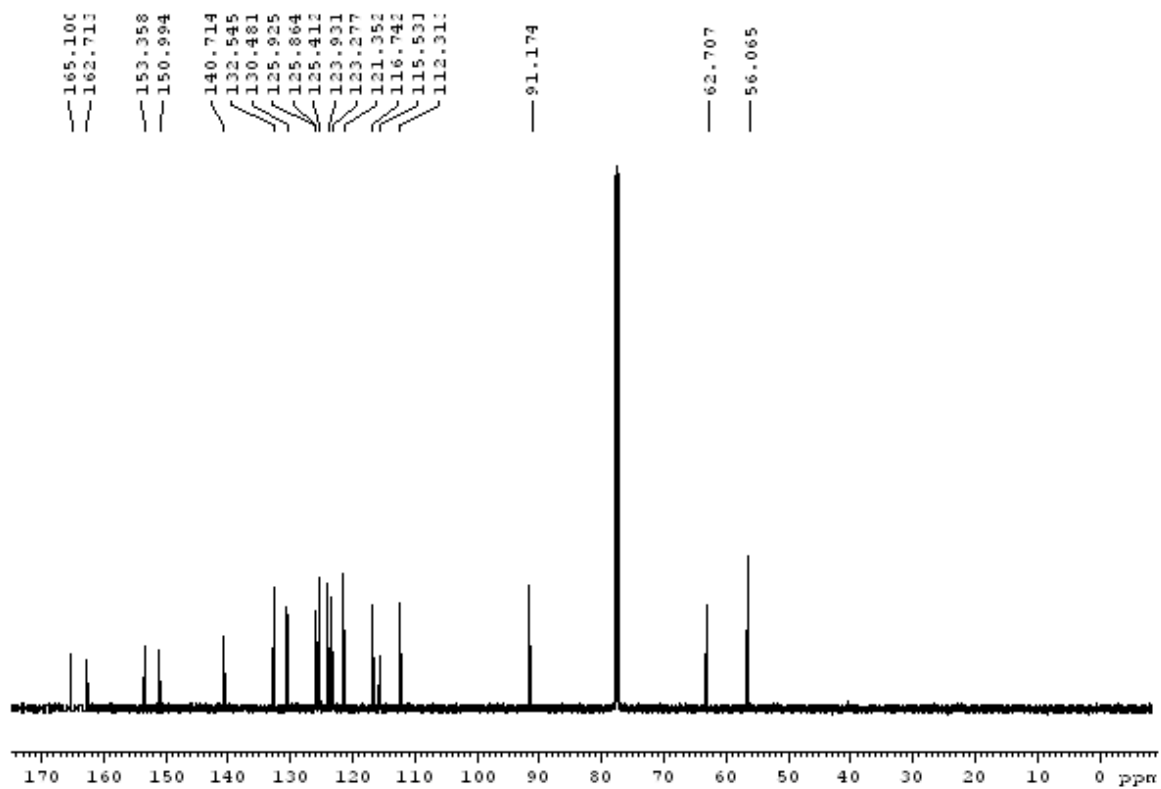

**<sup>1</sup>H-NMR (CDCl<sub>3</sub>, 500 MHz) of compound 8c.**

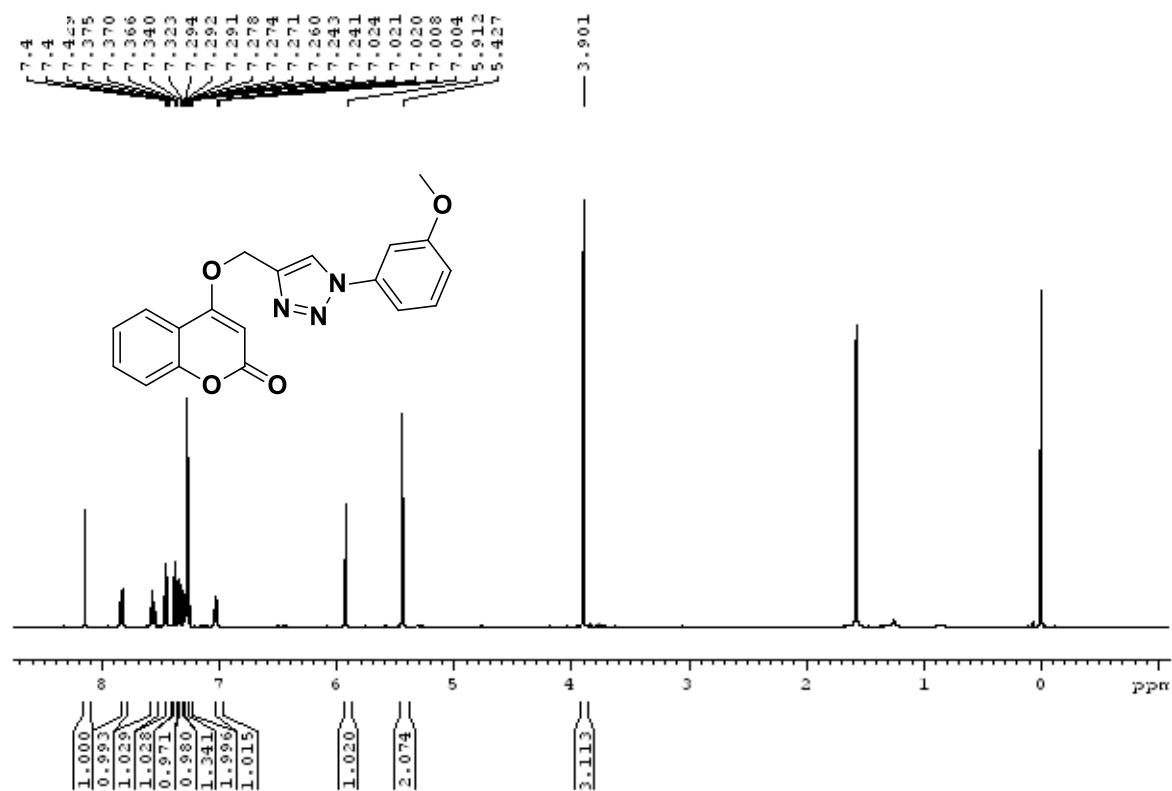

**<sup>13</sup>C-NMR (CDCl<sub>3</sub>, 125 MHz) of compound 8c.**

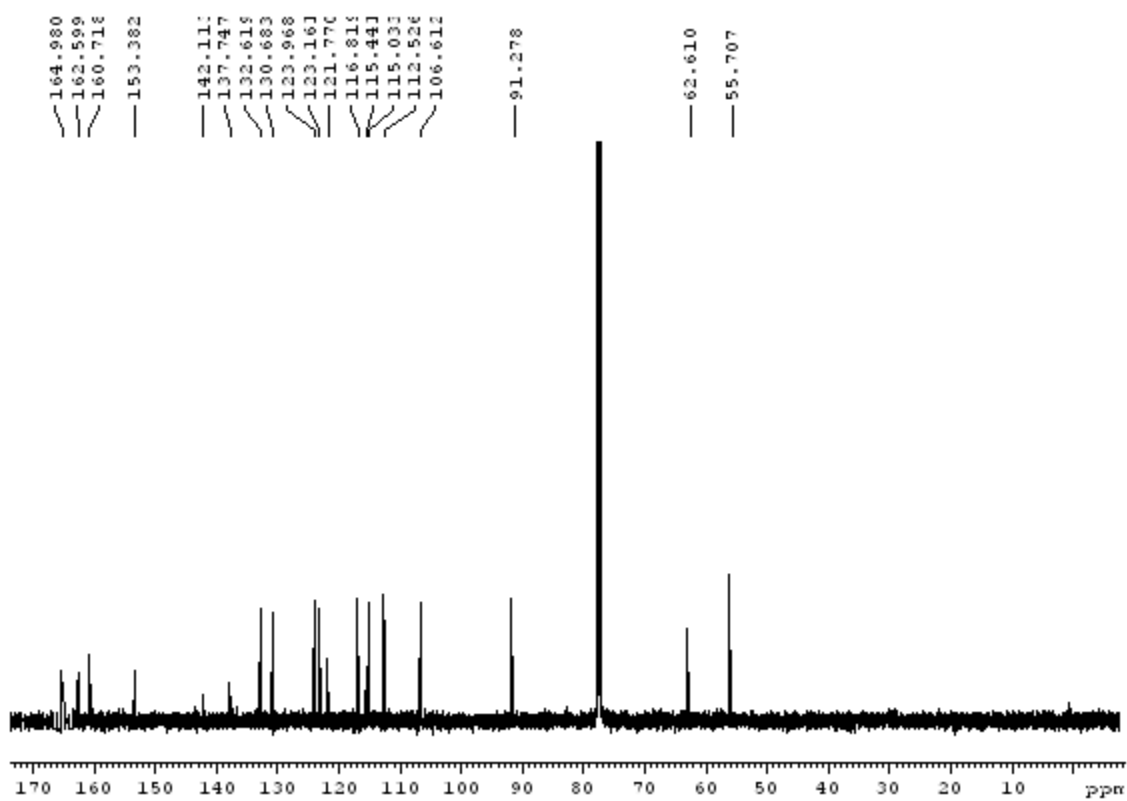

**<sup>1</sup>H-NMR (CDCl<sub>3</sub>, 500 MHz) of compound 8d.**

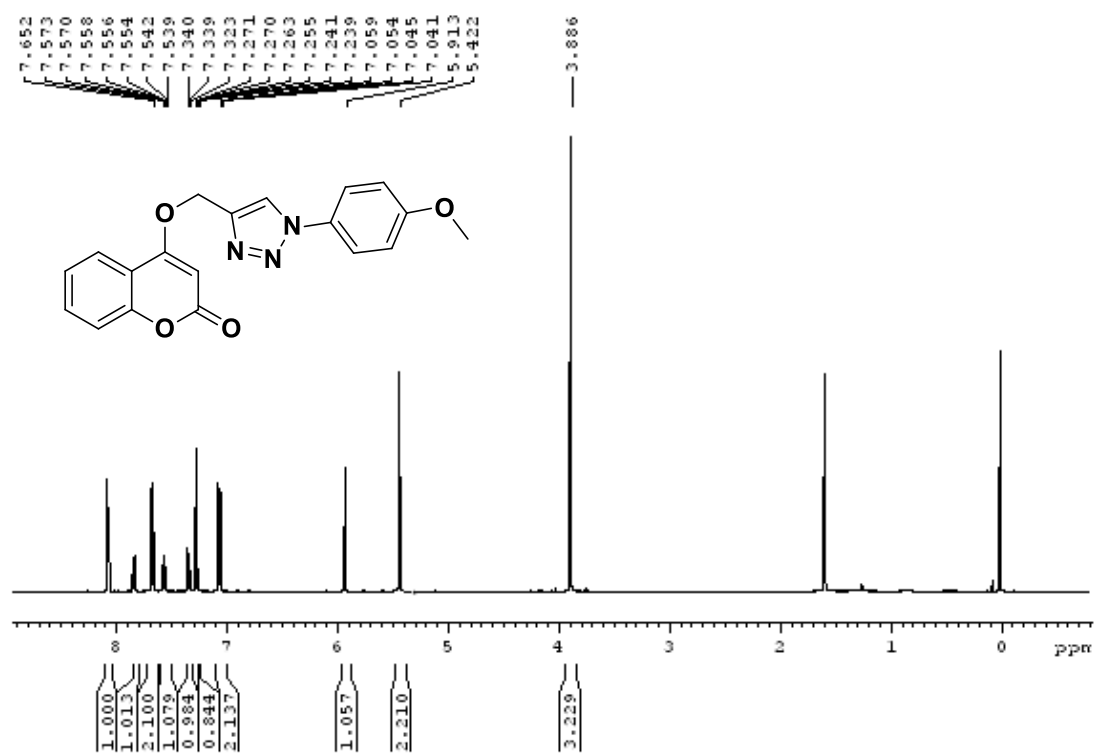

**<sup>13</sup>C-NMR (CDCl<sub>3</sub>, 125 MHz) of compound 8d.**

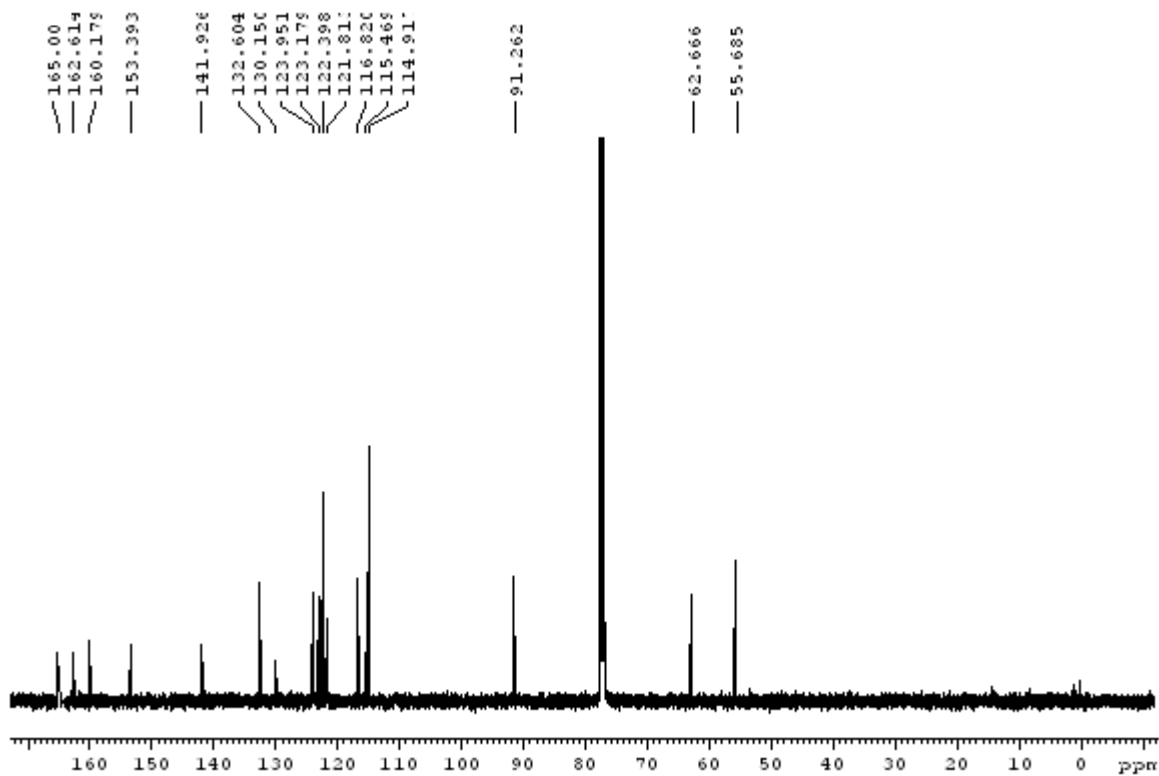

**<sup>1</sup>H-NMR (CDCl<sub>3</sub>, 600 MHz) of compound 8e.**

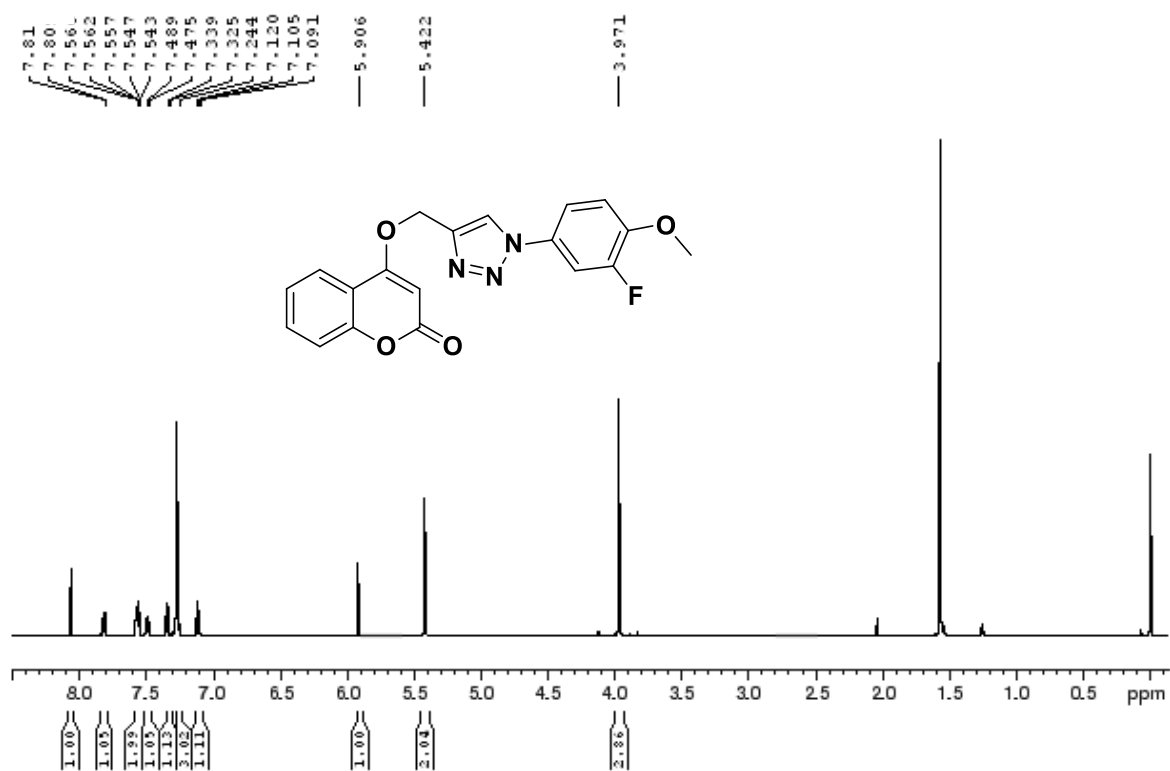

**<sup>13</sup>C-NMR (CDCl<sub>3</sub>, 150 MHz) of compound 8e.**

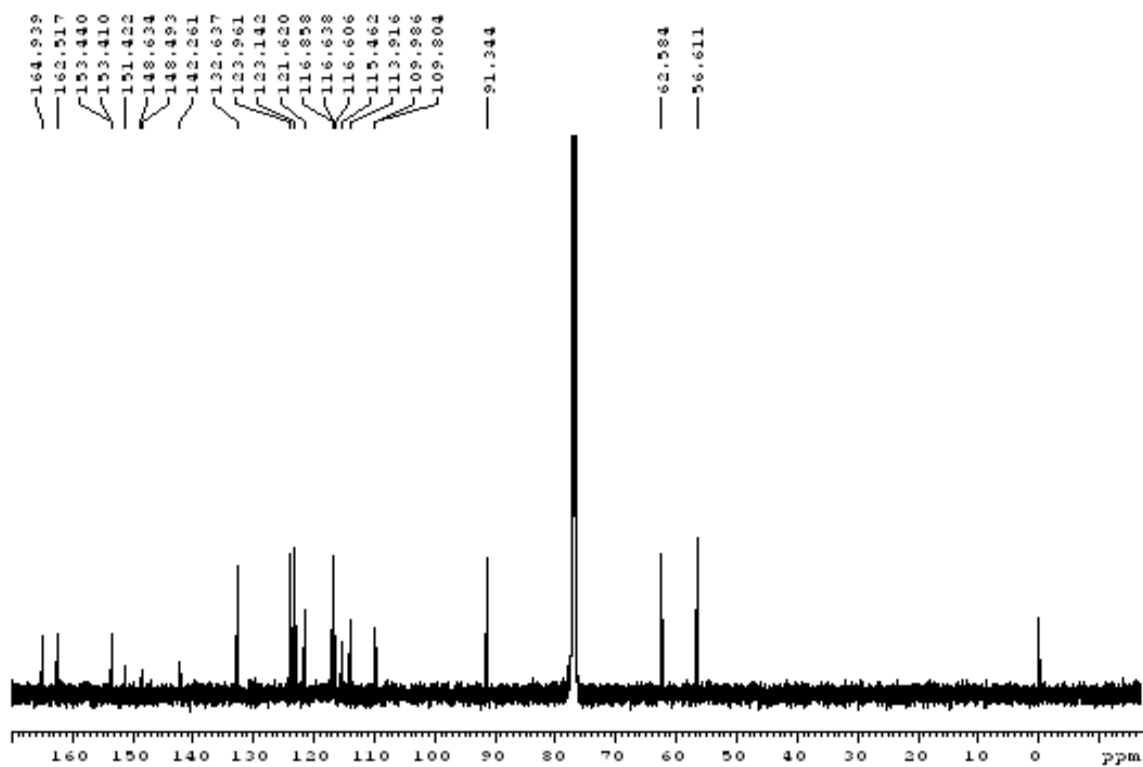

<sup>1</sup>H-NMR ((CD<sub>3</sub>)<sub>2</sub>SO, 500 MHz) of compound 8f.

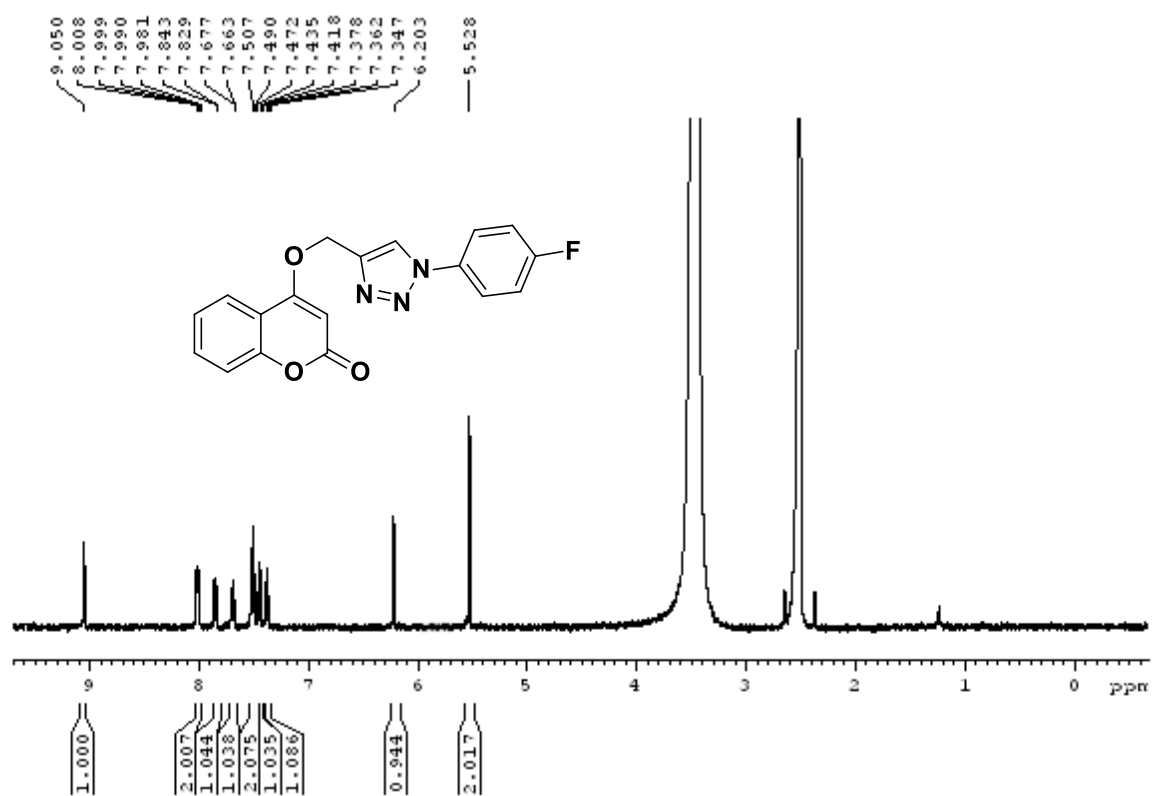

<sup>13</sup>C-NMR ((CD<sub>3</sub>)<sub>2</sub>SO, 125 MHz) of compound 8f

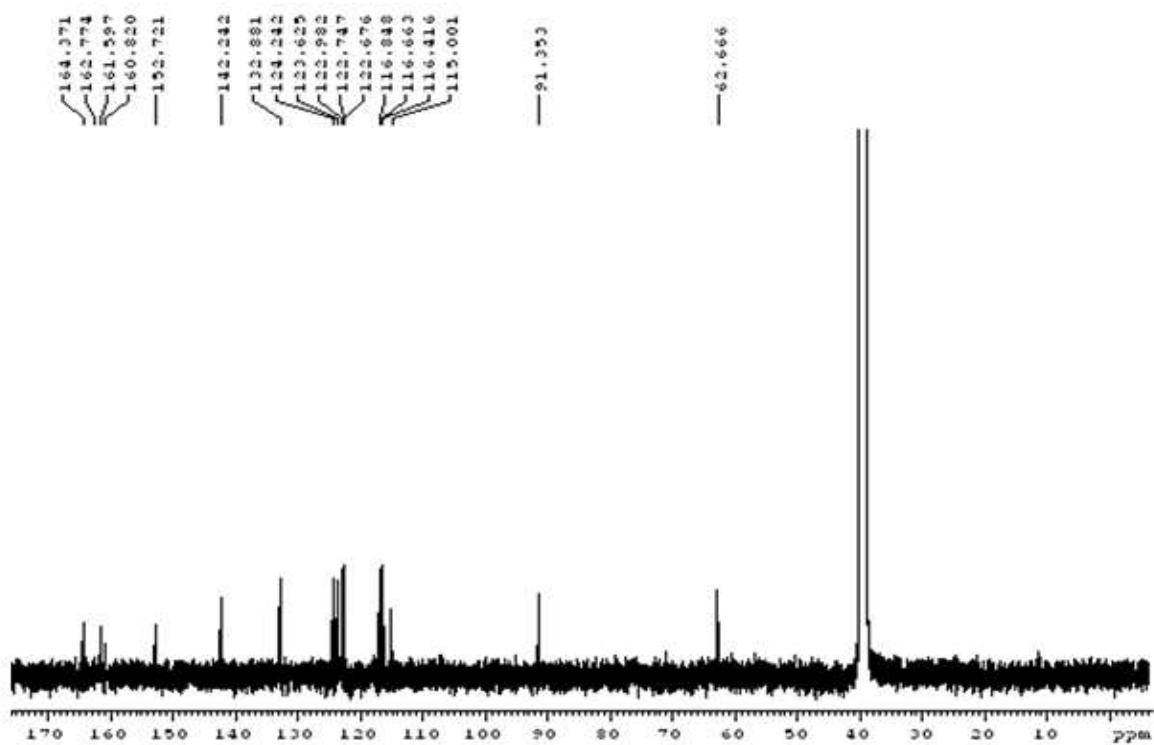



<sup>1</sup>H-NMR ((CD<sub>3</sub>)<sub>2</sub>SO, 500 MHz) of compound 8g.

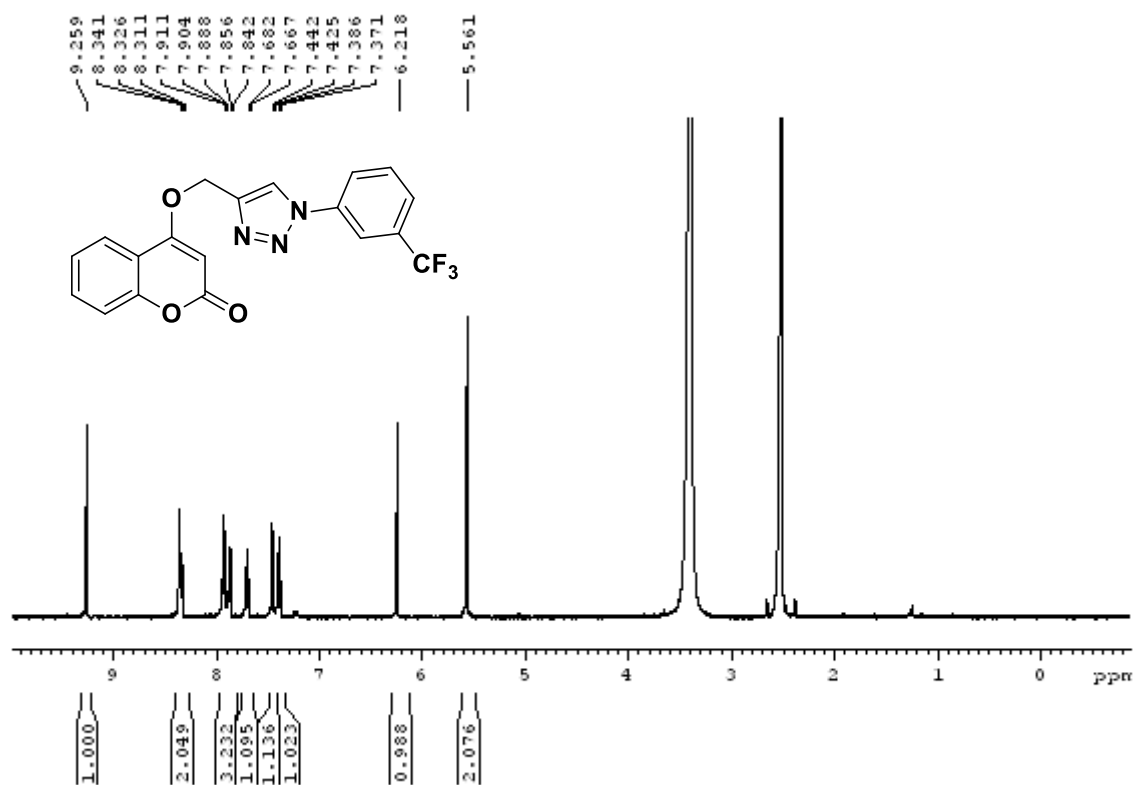

<sup>13</sup>C-NMR ((CD<sub>3</sub>)<sub>2</sub>SO, 125 MHz) of compound 8g.

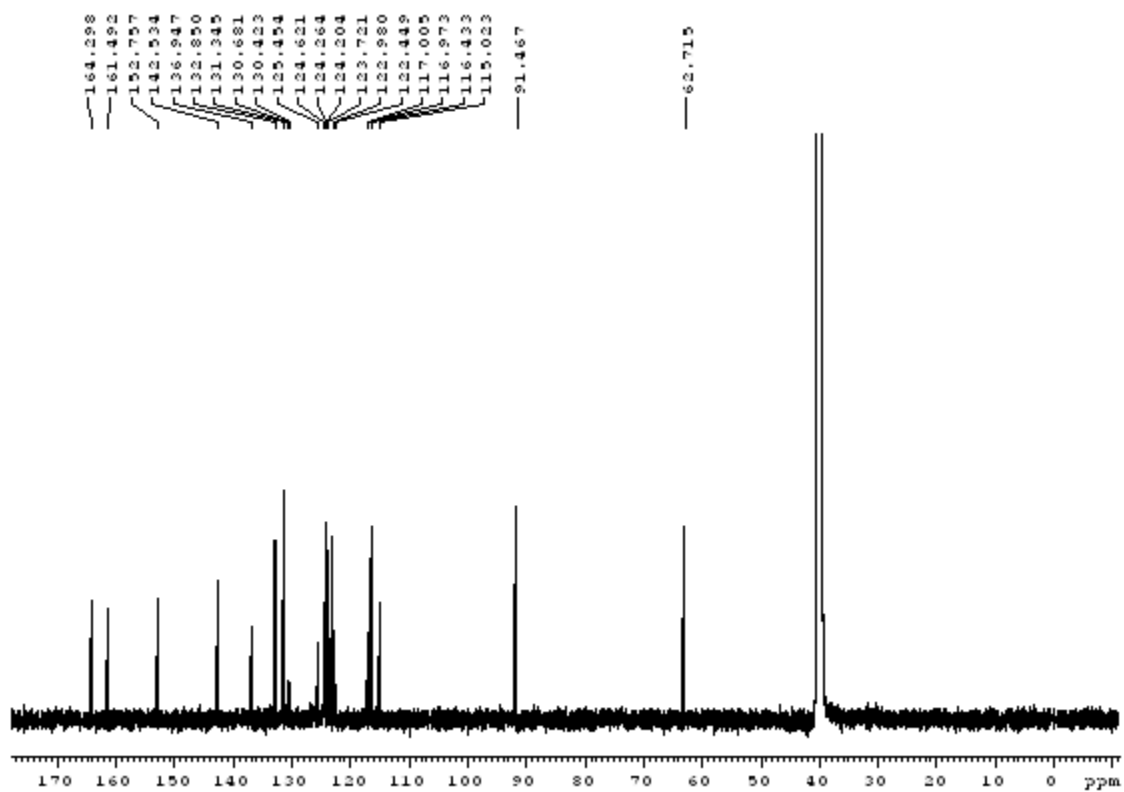

<sup>1</sup>H-NMR ((CD<sub>3</sub>)<sub>2</sub>SO, 600 MHz) of compound 8h.

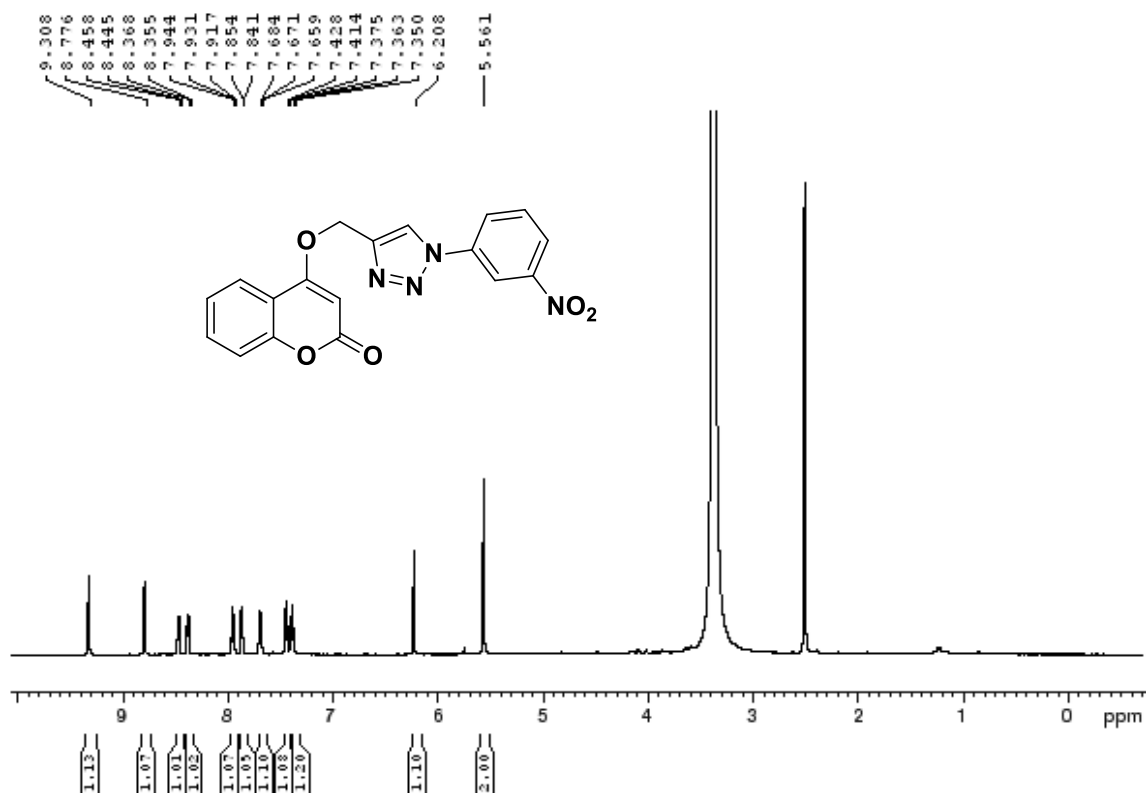

<sup>13</sup>C-NMR ((CD<sub>3</sub>)<sub>2</sub>SO, 150 MHz) of compound 8h.

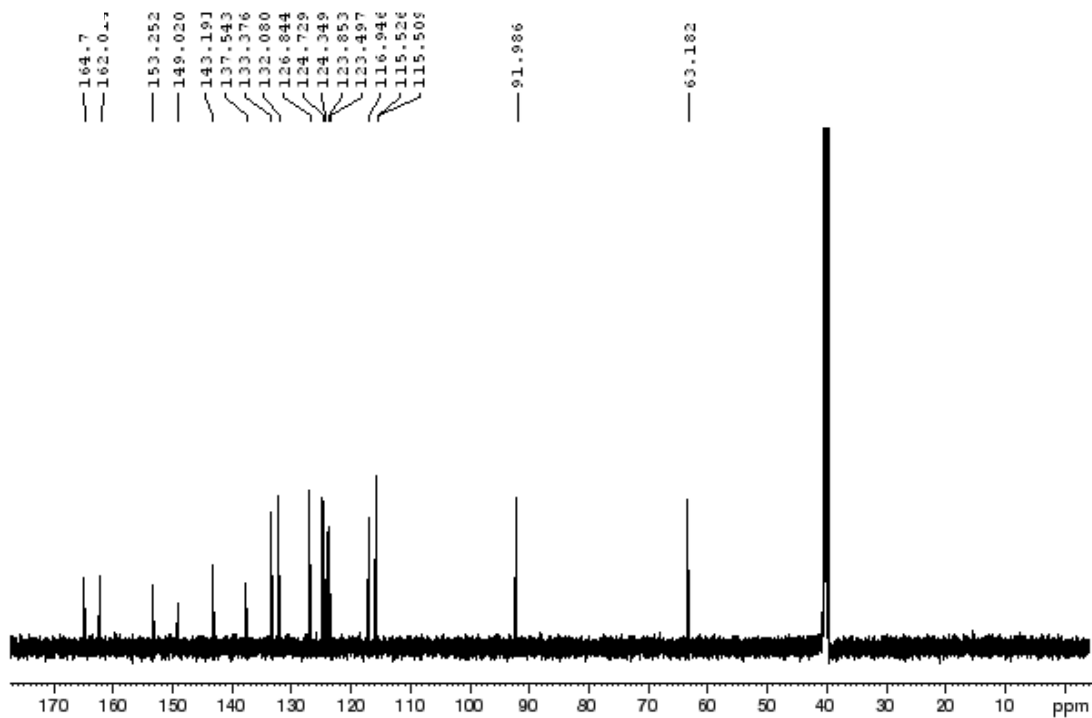

<sup>1</sup>H-NMR ((CD<sub>3</sub>)<sub>2</sub>SO, 500 MHz) of compound 8i.

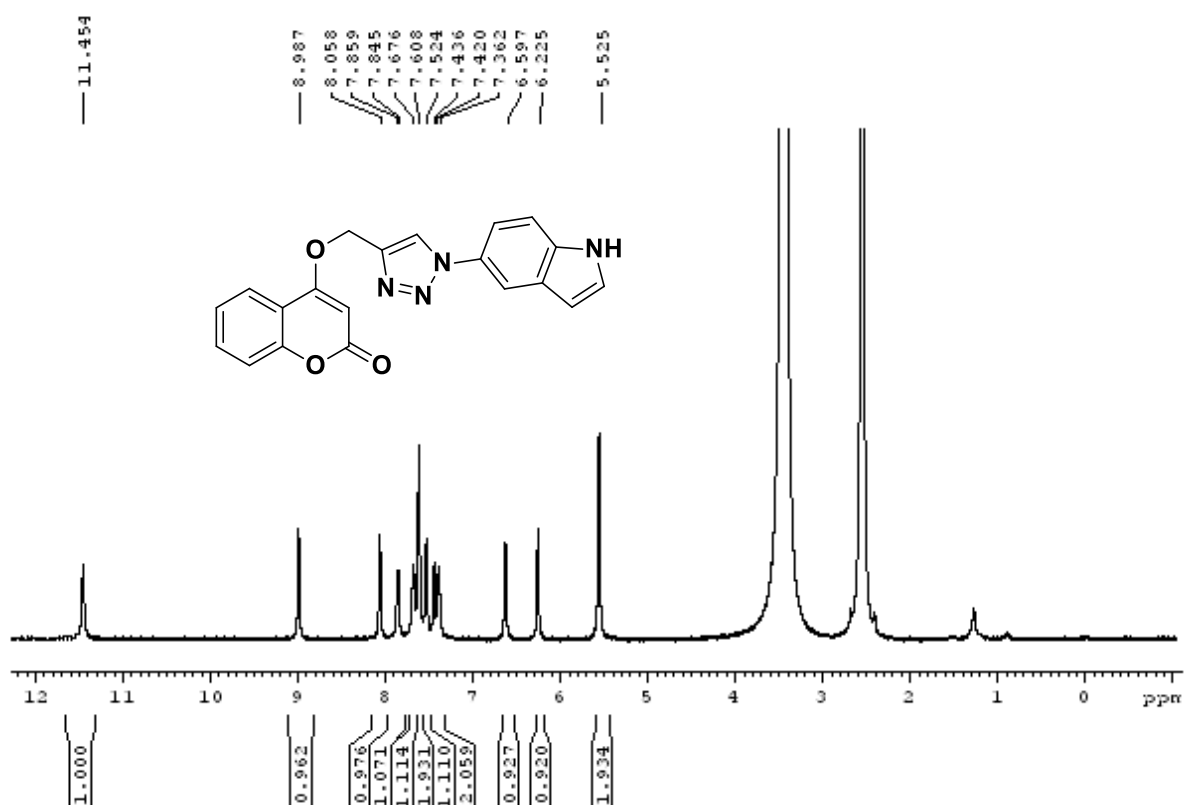

<sup>13</sup>C-NMR ((CD<sub>3</sub>)<sub>2</sub>SO, 125 MHz) of compound 8i.

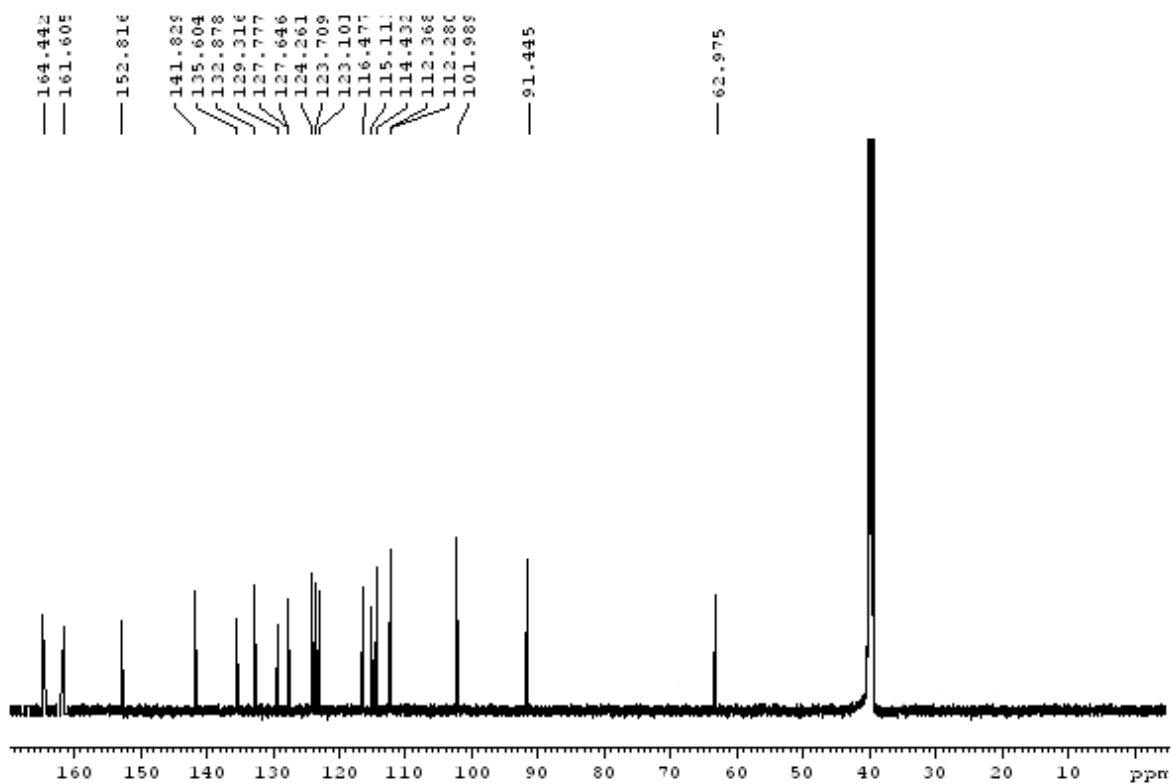

<sup>1</sup>H-NMR ((CD<sub>3</sub>)<sub>2</sub>SO, 500 MHz) del compuesto 8j.

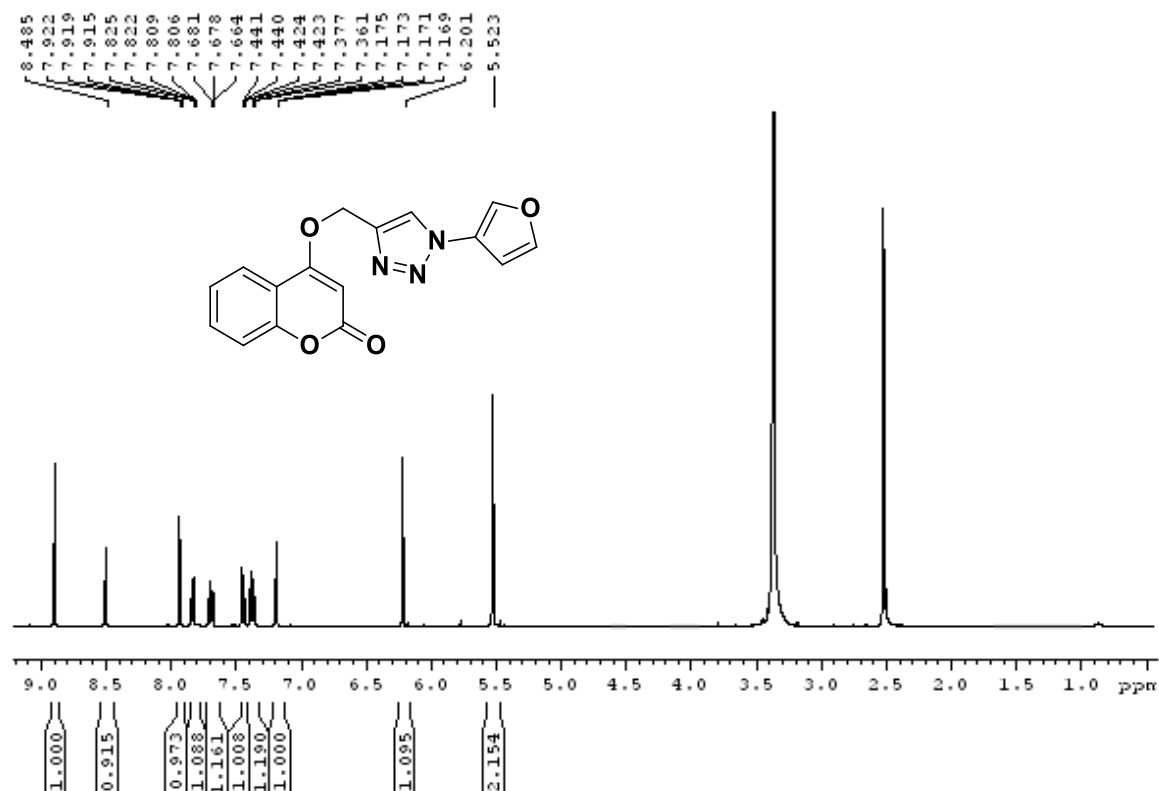

<sup>13</sup>C-NMR ((CD<sub>3</sub>)<sub>2</sub>SO, 125 MHz) of compound 8j.

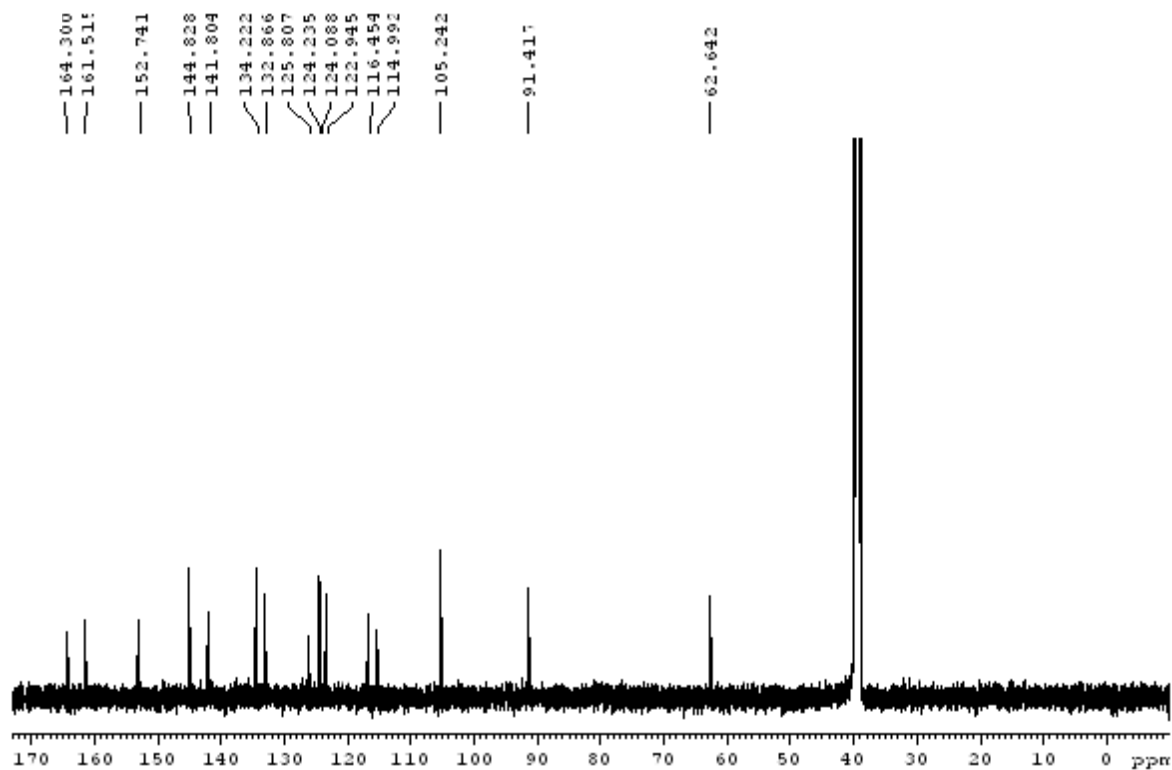

**<sup>1</sup>H-NMR (CDCl<sub>3</sub>, 500 MHz) of compound 8k.**

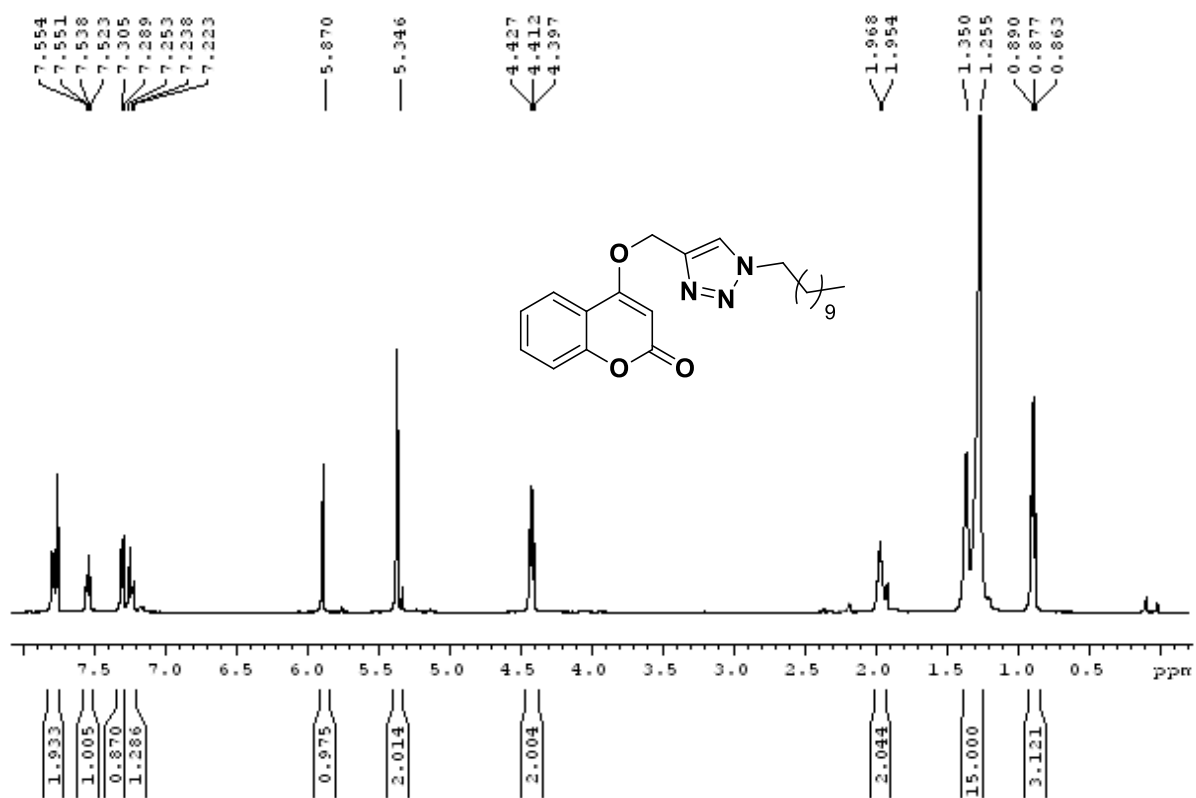

**<sup>13</sup>C-NMR (CDCl<sub>3</sub>, 125 MHz) of compound 8k.**

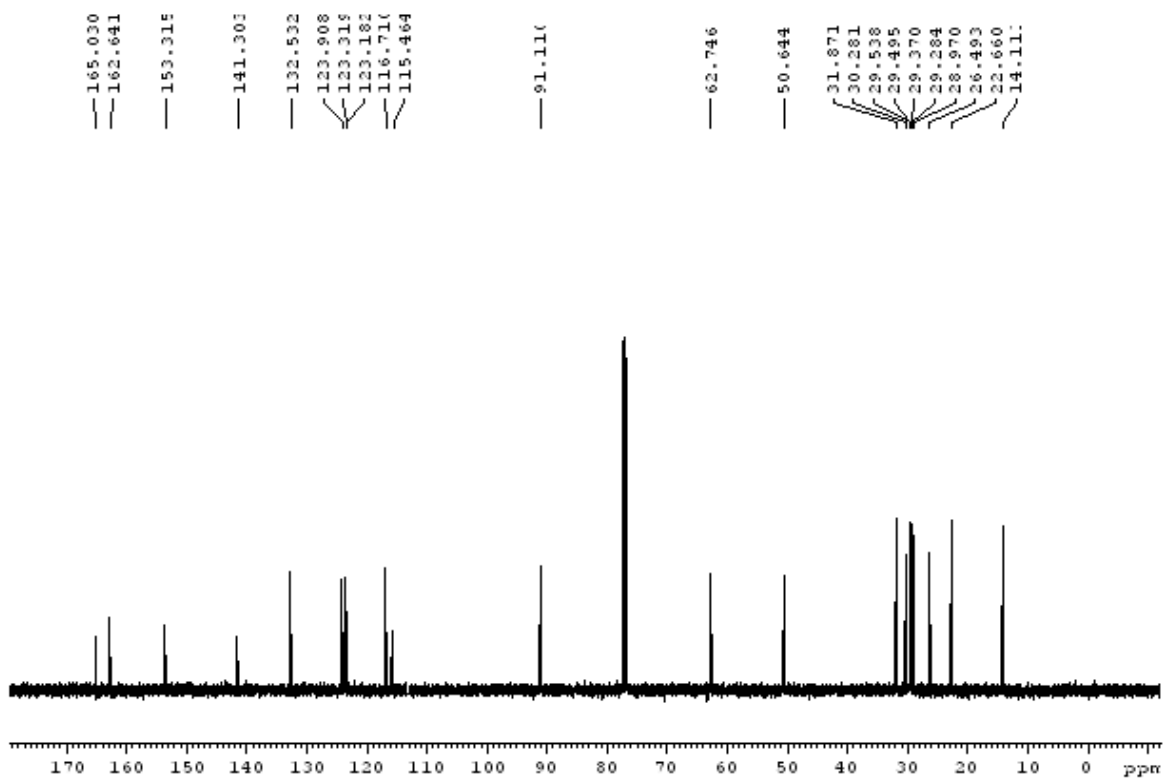

**<sup>1</sup>H-NMR (CDCl<sub>3</sub>, 500 MHz) of compound 8l.**

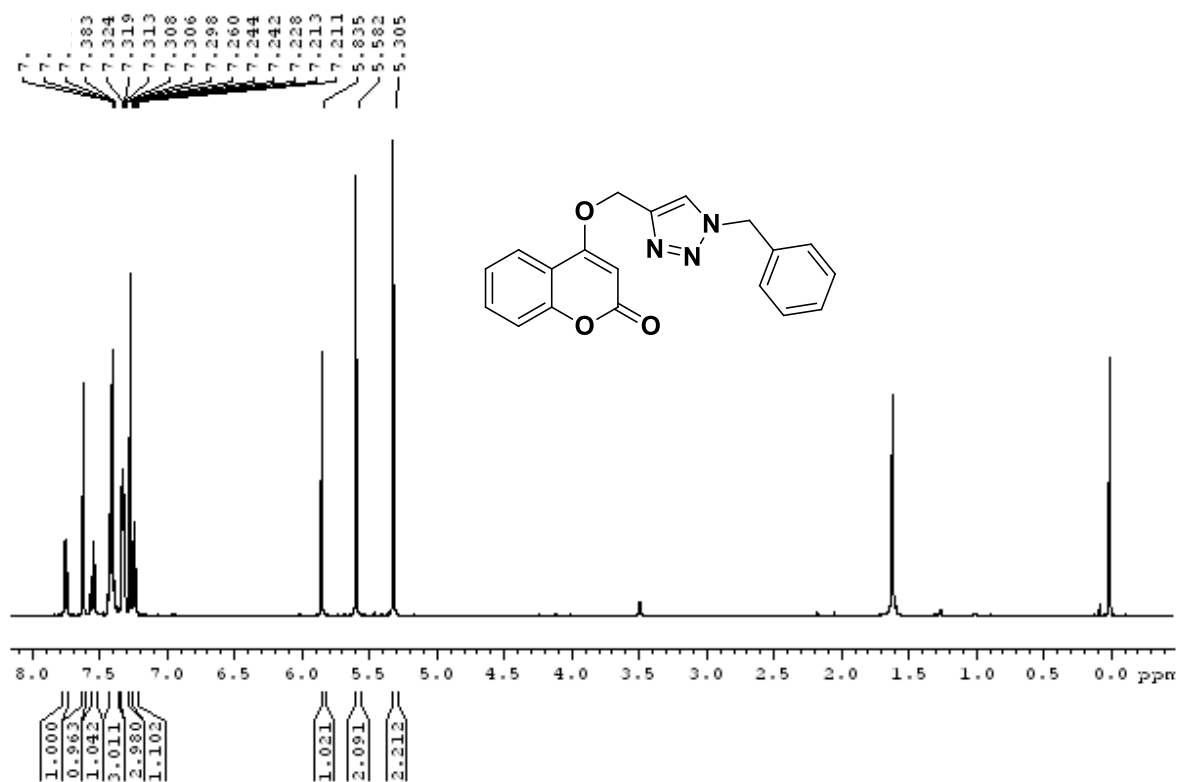

<sup>13</sup>C-NMR (CDCl<sub>3</sub>, 125 MHz) of compound 8l.

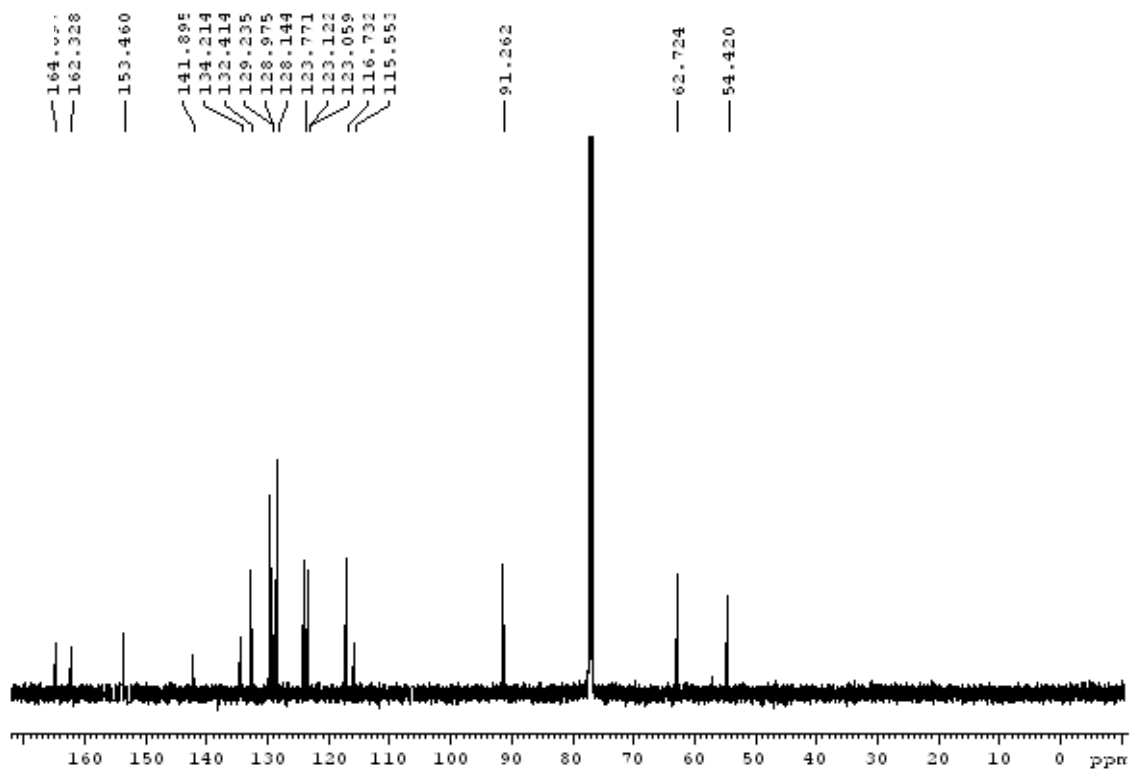

<sup>1</sup>H-NMR (CDCl<sub>3</sub>, 500 MHz) of compound 8m.

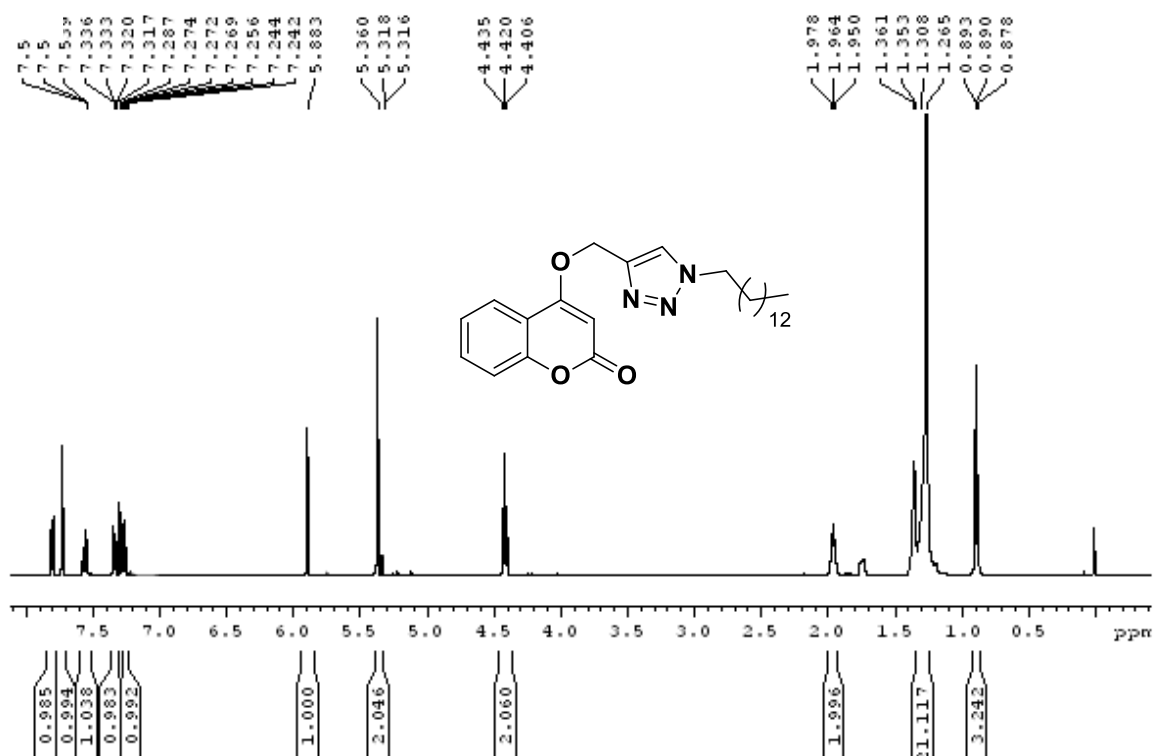

<sup>13</sup>C-NMR (CDCl<sub>3</sub>, 125 MHz) of compound 8m.

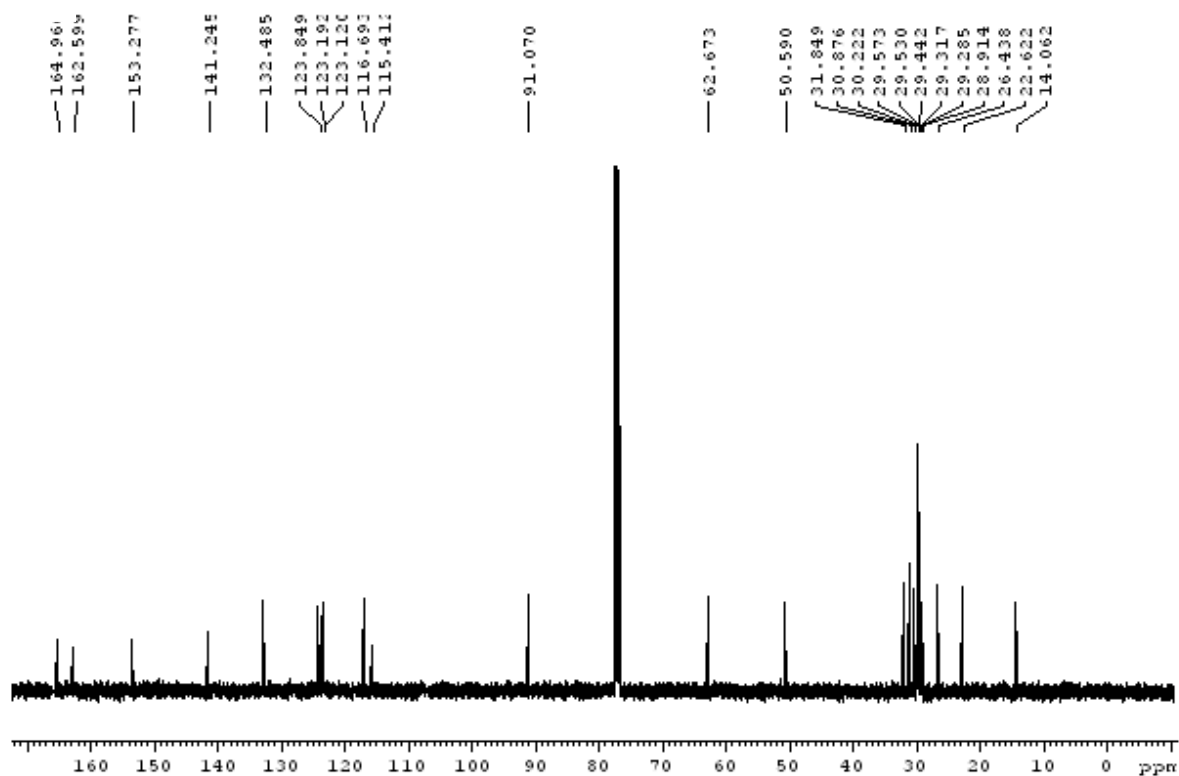

<sup>1</sup>H-NMR ((CD<sub>3</sub>)<sub>2</sub>SO, 500 MHz) of compound 9a.

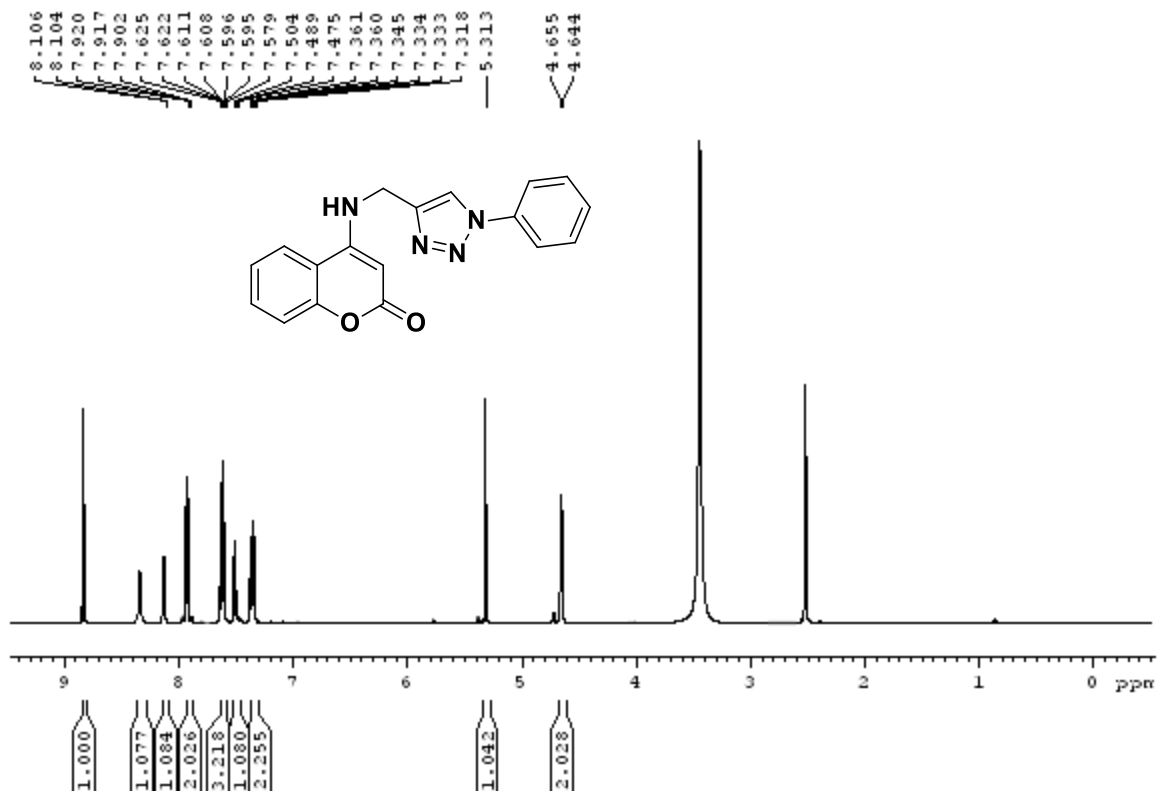

$^{13}\text{C-NMR}$  (( $\text{CD}_3$ ) $_2\text{SO}$ , 125 MHz) of compound 9a.

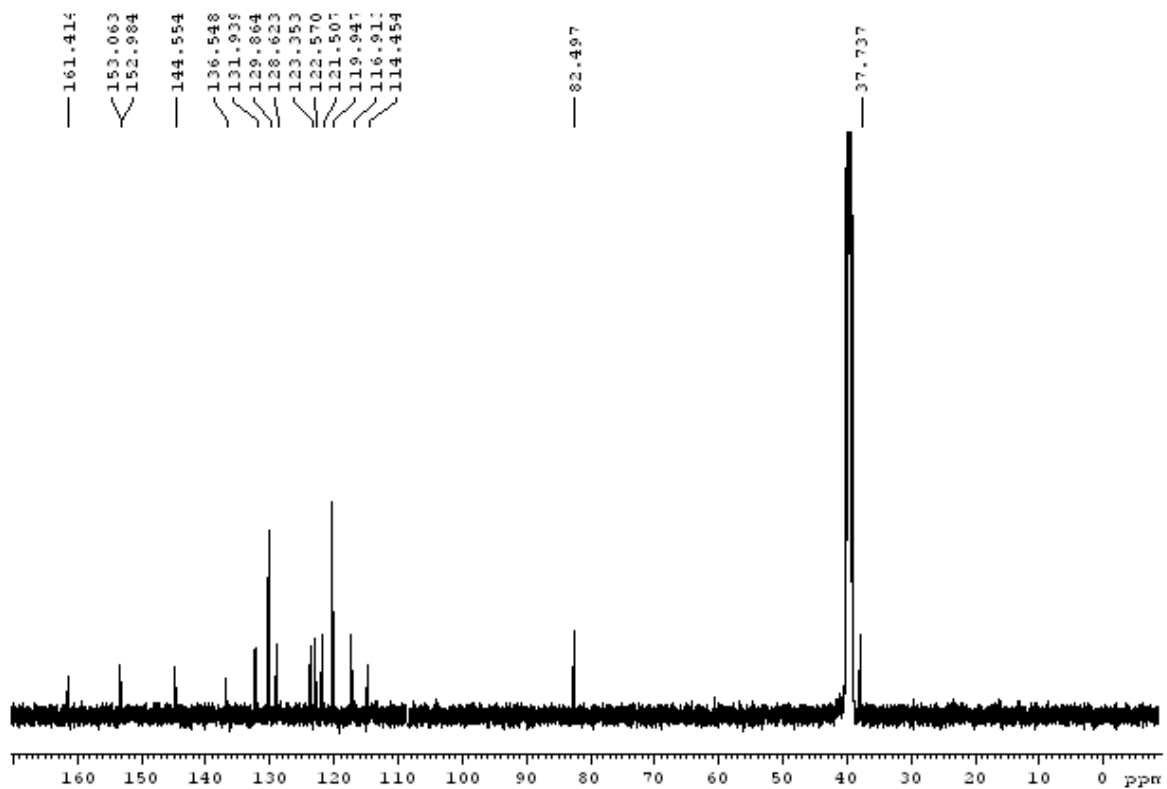

$^1\text{H-NMR}$  (( $\text{CD}_3$ ) $_2\text{SO}$ , 500 MHz) of compound 9b.



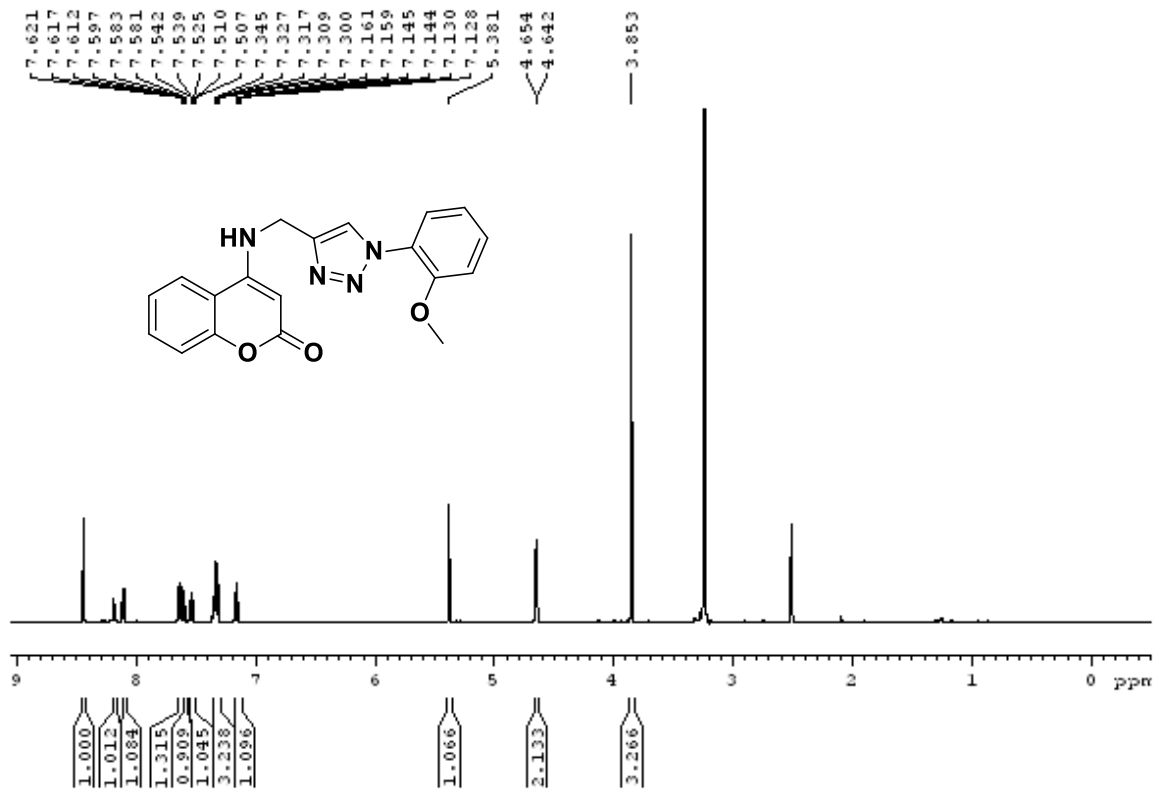

**<sup>13</sup>C-NMR ((CD<sub>3</sub>)<sub>2</sub>SO, 125 MHz) of compound 9b.**

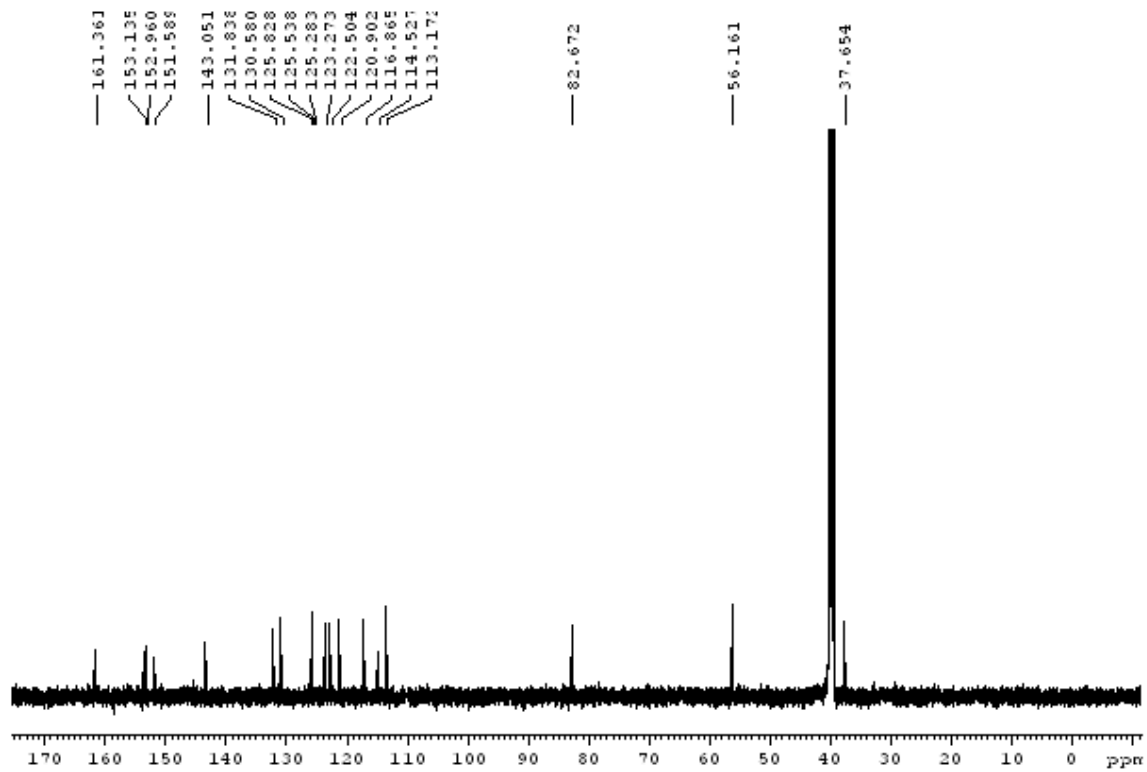

**<sup>1</sup>H-NMR ((CD<sub>3</sub>)<sub>2</sub>SO, 500 MHz) of compound 9c.**

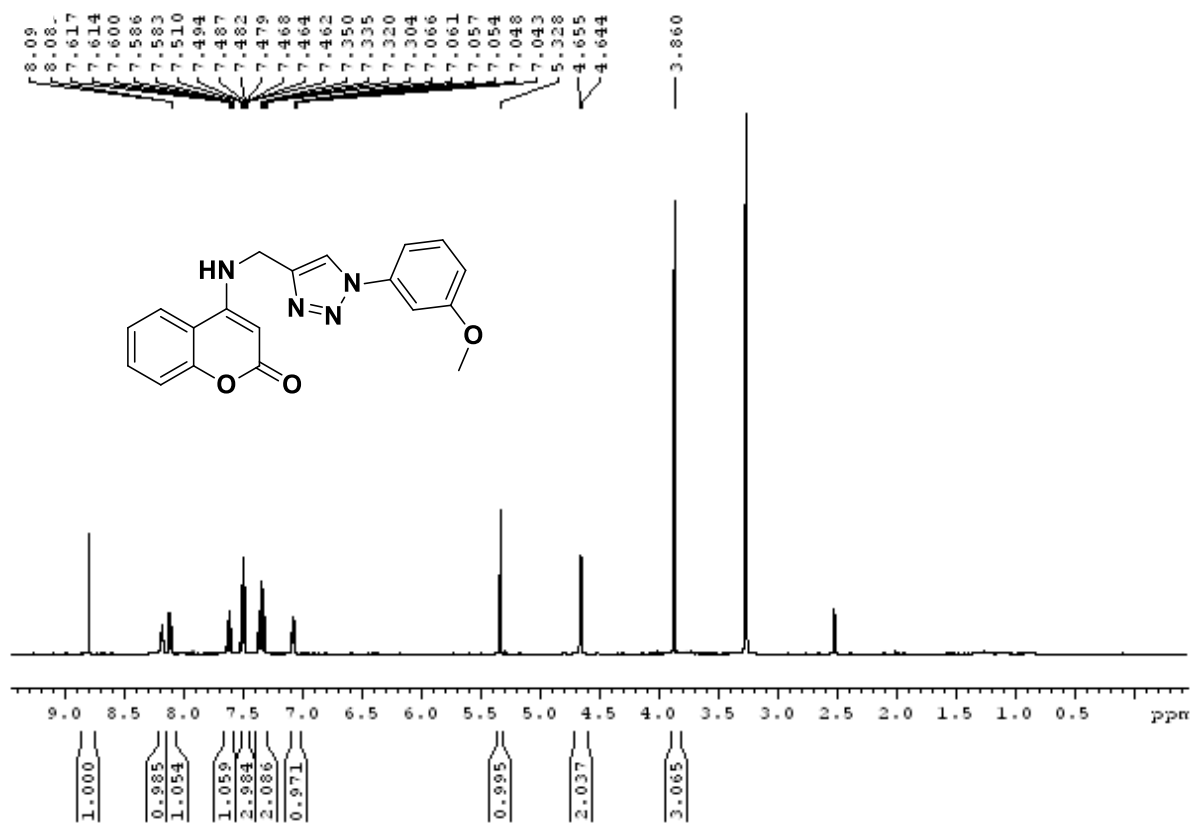

<sup>13</sup>C-NMR ((CD<sub>3</sub>)<sub>2</sub>SO, 125 MHz) of compound 9c.

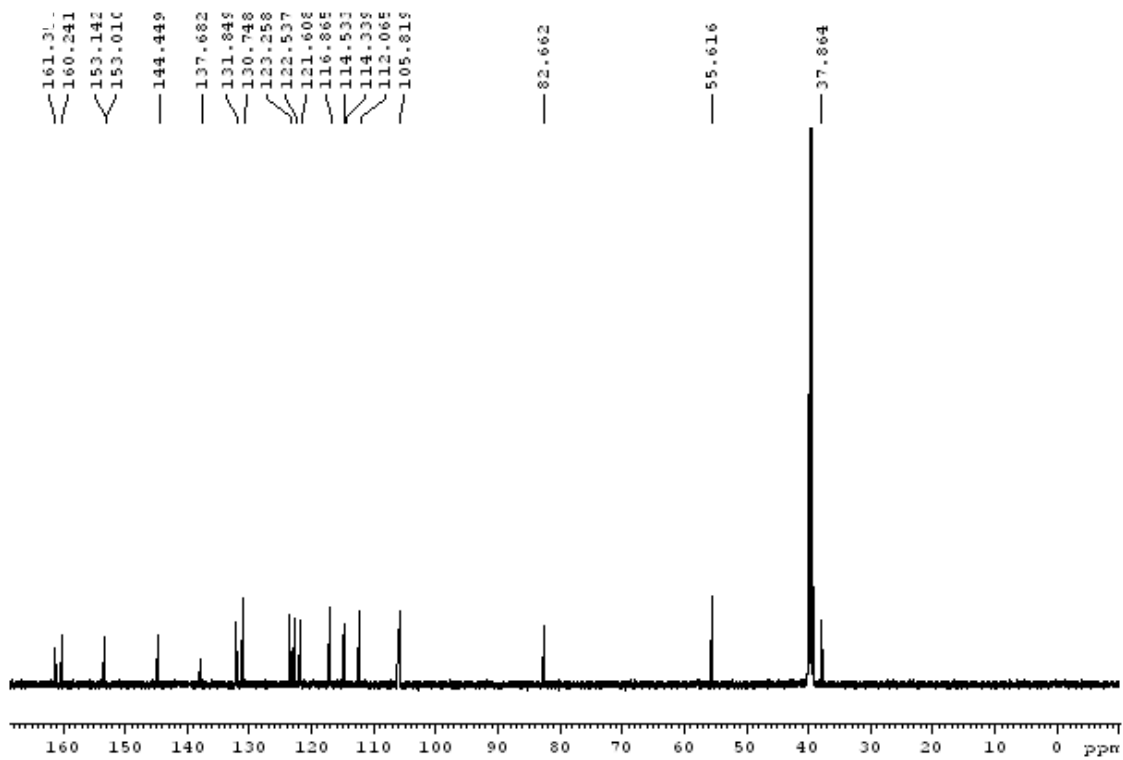

<sup>1</sup>H-NMR ((CD<sub>3</sub>)<sub>2</sub>SO, 500 MHz) of compound 9d.

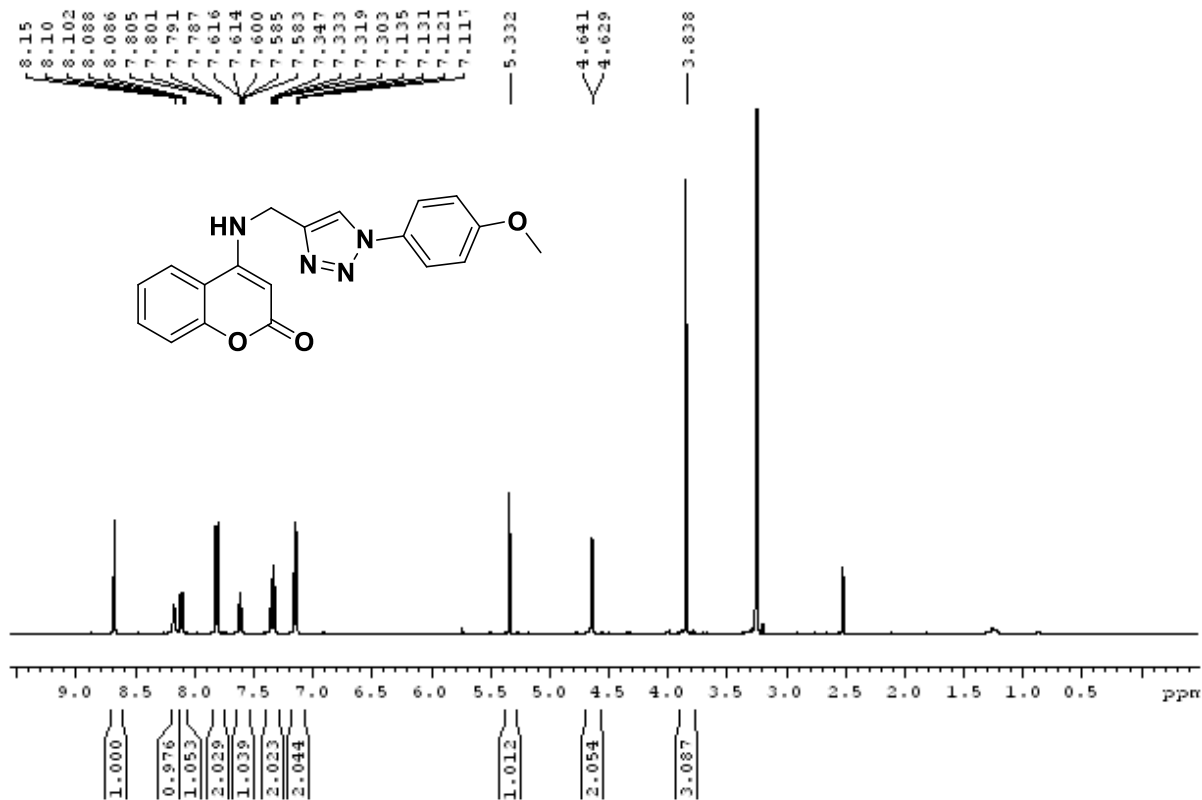

**<sup>13</sup>C-NMR** ((CD<sub>3</sub>)<sub>2</sub>SO, 125 MHz) of compound 9d.

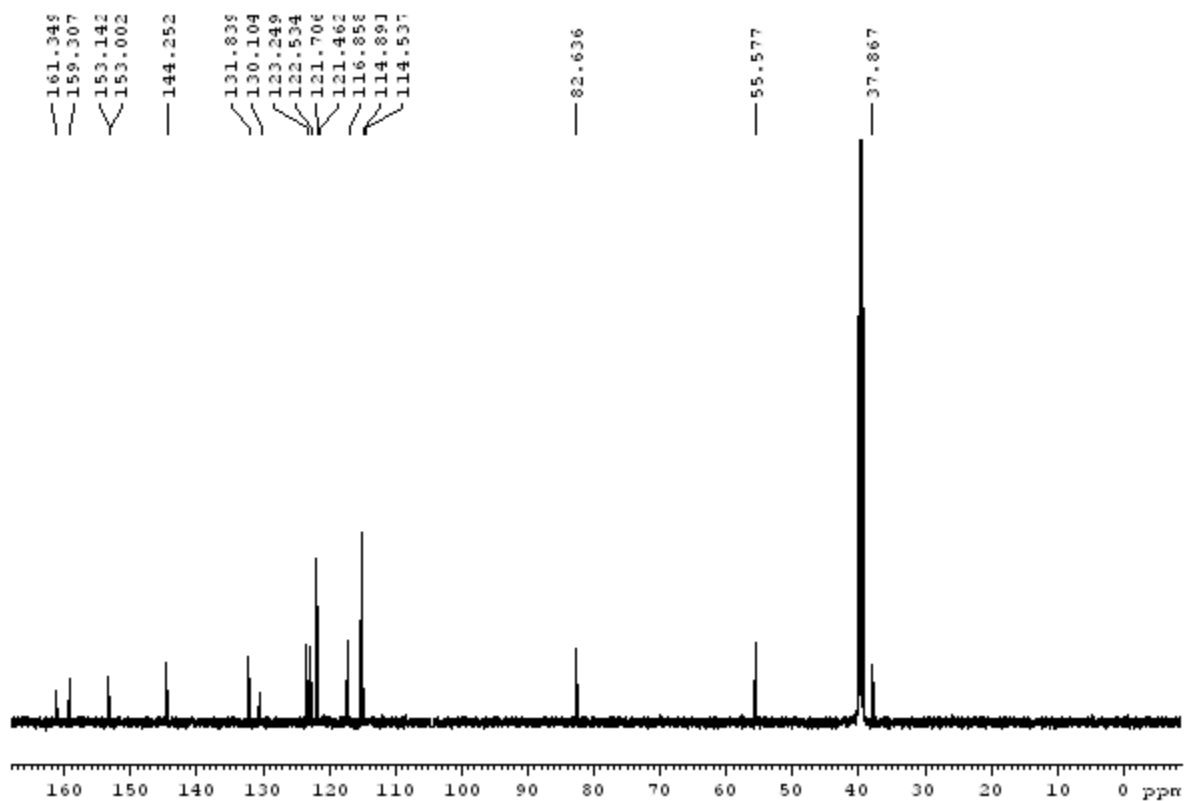

<sup>1</sup>H-NMR ((CD<sub>3</sub>)<sub>2</sub>SO, 500 MHz) of compound 9e.

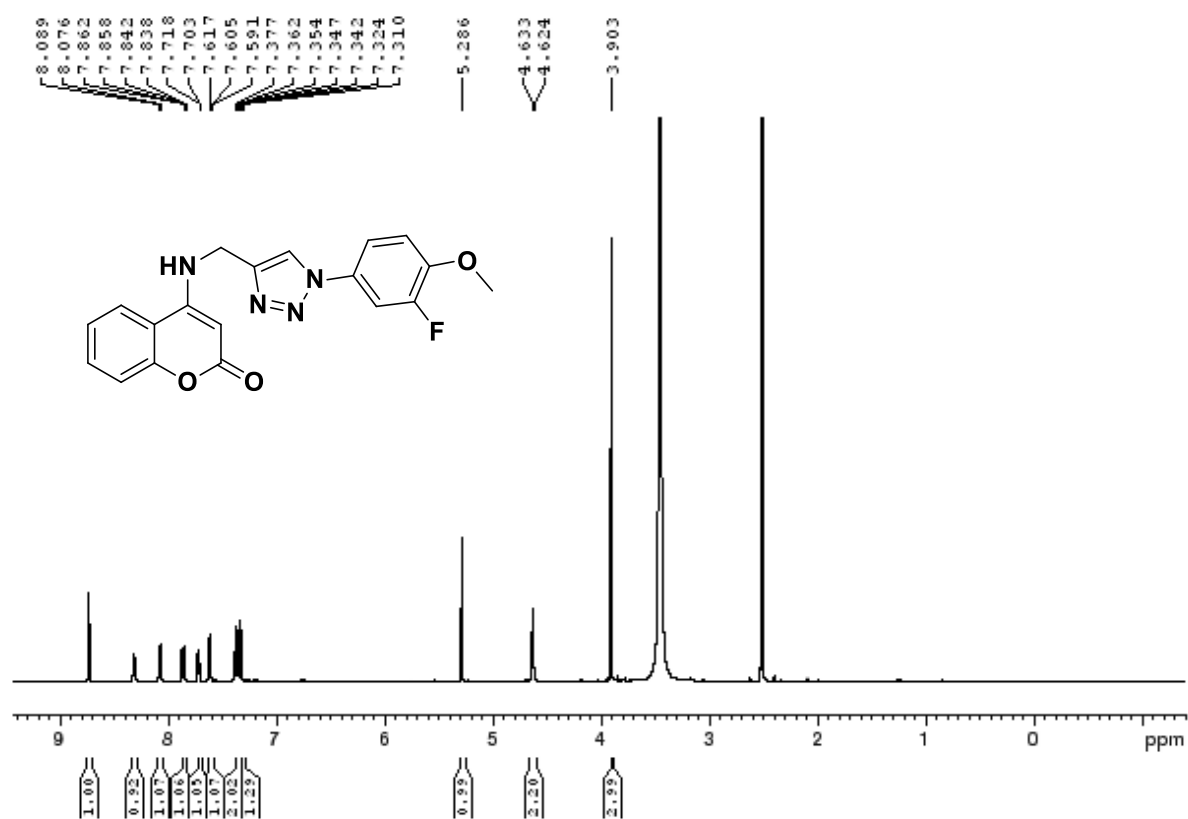

<sup>13</sup>C-NMR ((CD<sub>3</sub>)<sub>2</sub>SO, 125 MHz) of compound 9e.

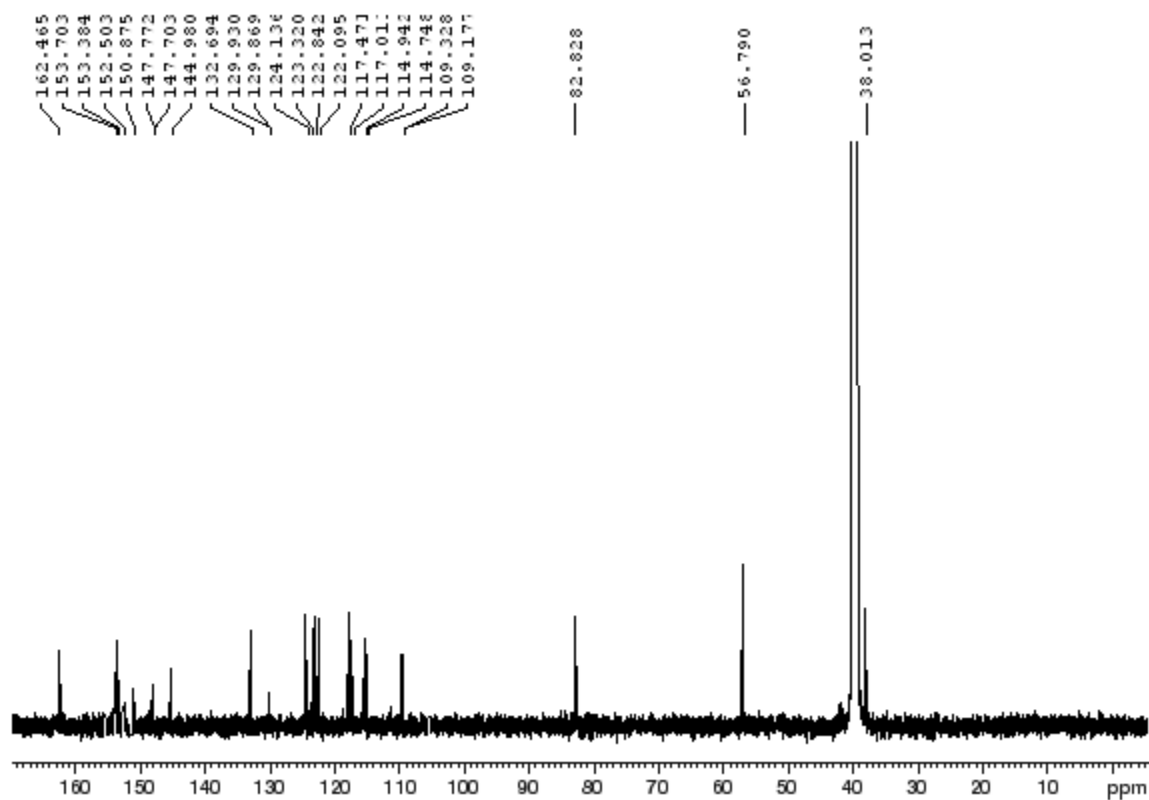

<sup>1</sup>H-NMR ((CD<sub>3</sub>)<sub>2</sub>SO, 500 MHz) of compound 9f:

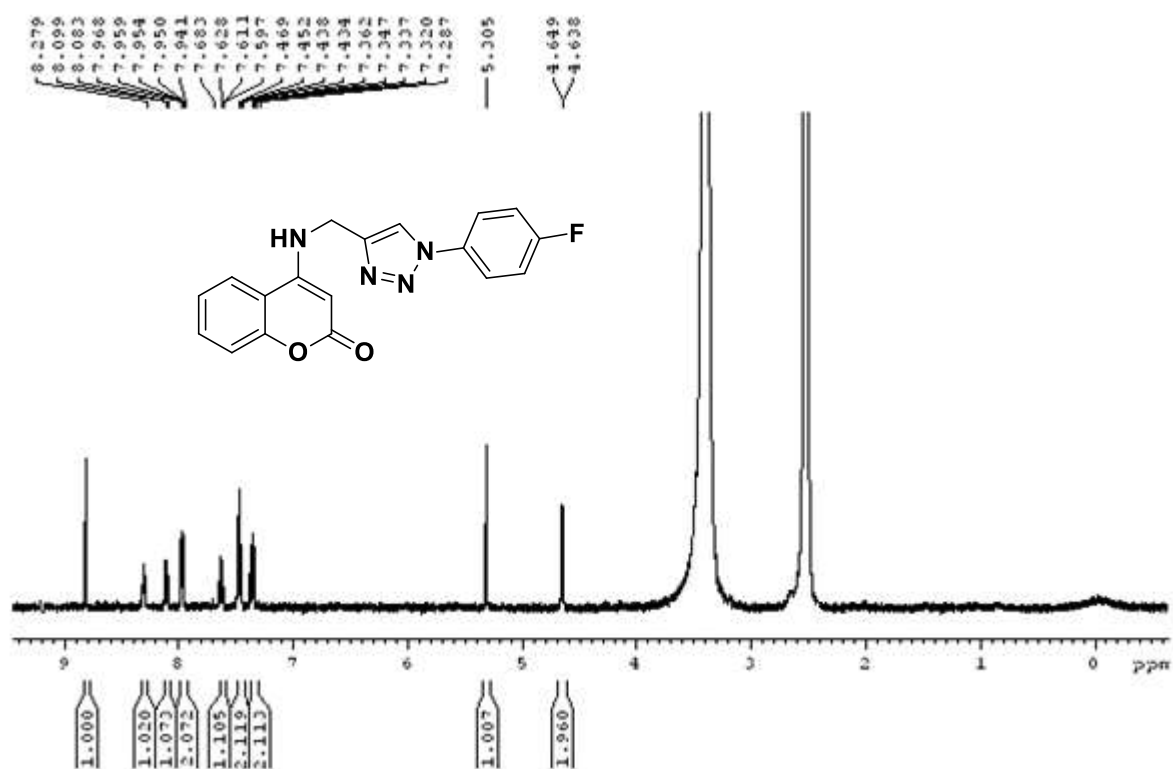

<sup>13</sup>C-NMR ((CD<sub>3</sub>)<sub>2</sub>SO, 125 MHz) of compound 9f.

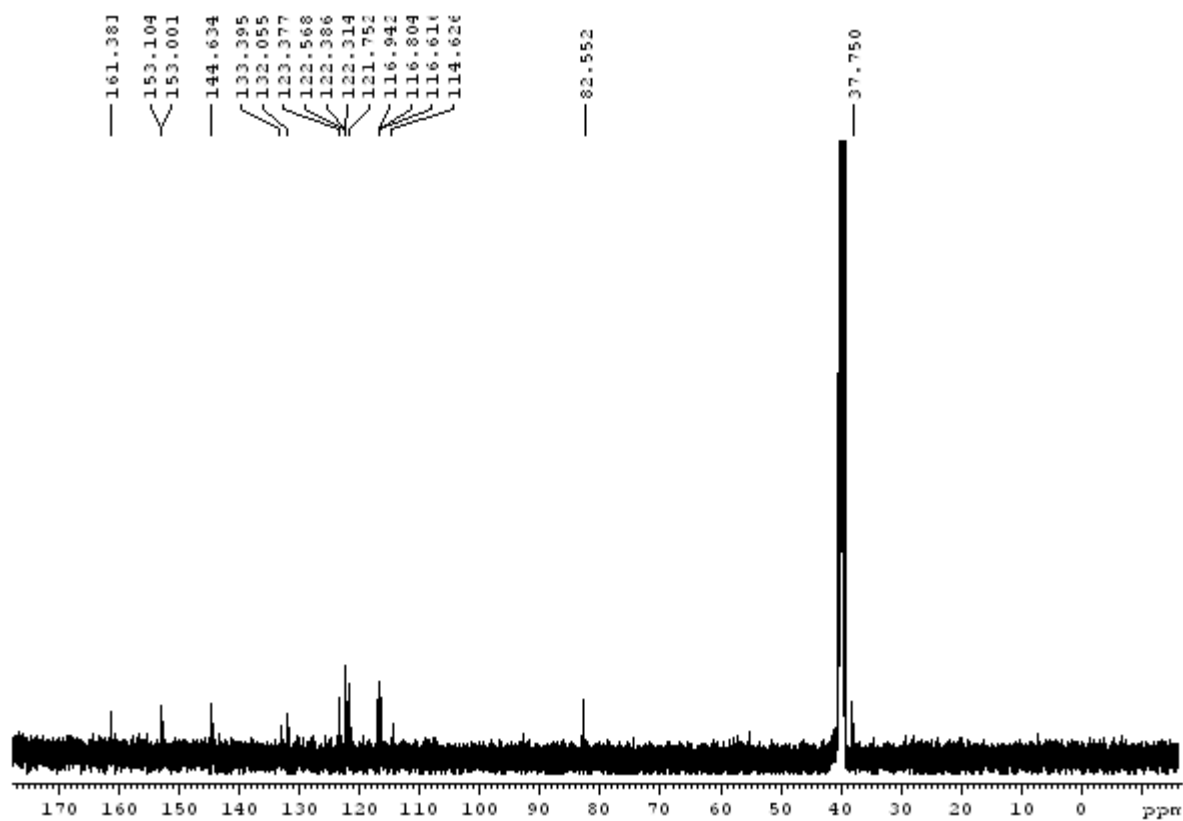

<sup>1</sup>H-NMR ((CD<sub>3</sub>)<sub>2</sub>SO, 500 MHz) of compound 9g.

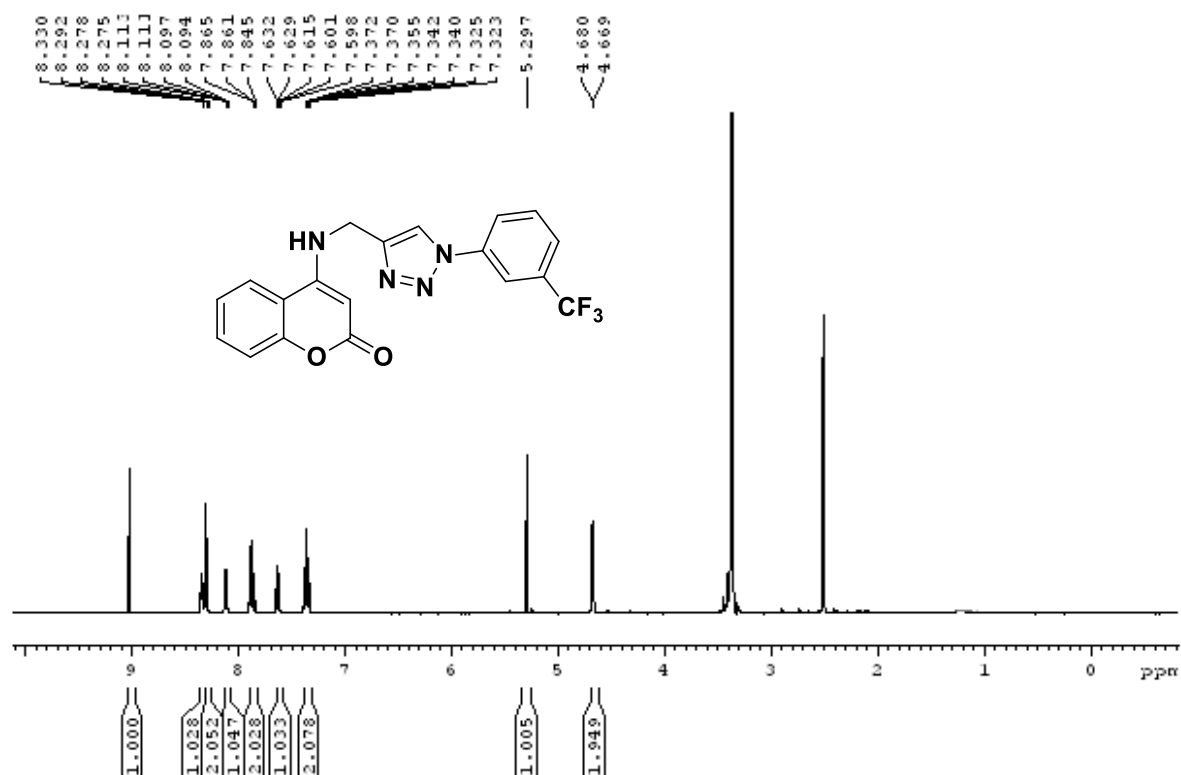

<sup>13</sup>C-NMR ((CD<sub>3</sub>)<sub>2</sub>SO, 125 MHz) of compound 9g.

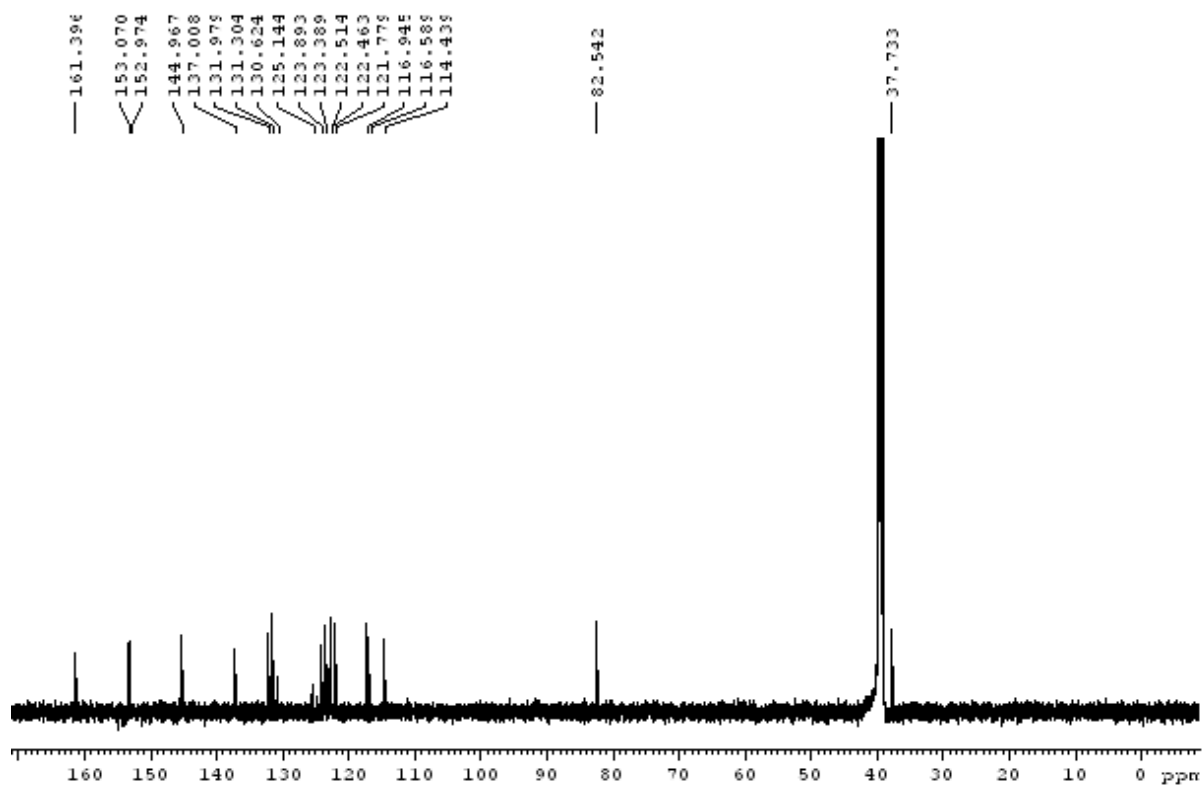

<sup>1</sup>H-NMR ((CD<sub>3</sub>)<sub>2</sub>SO, 600 MHz) of compound 9h.

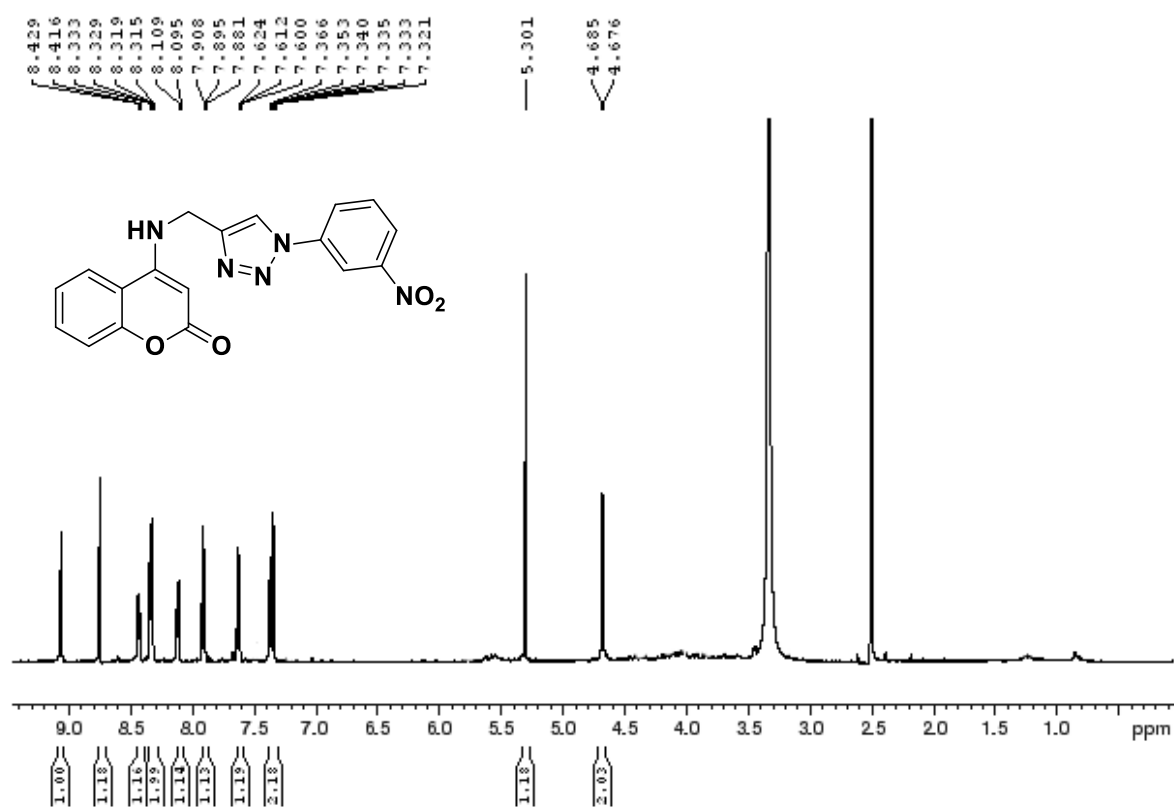

<sup>13</sup>C-NMR ((CD<sub>3</sub>)<sub>2</sub>SO, 150 MHz) of compound 9h.

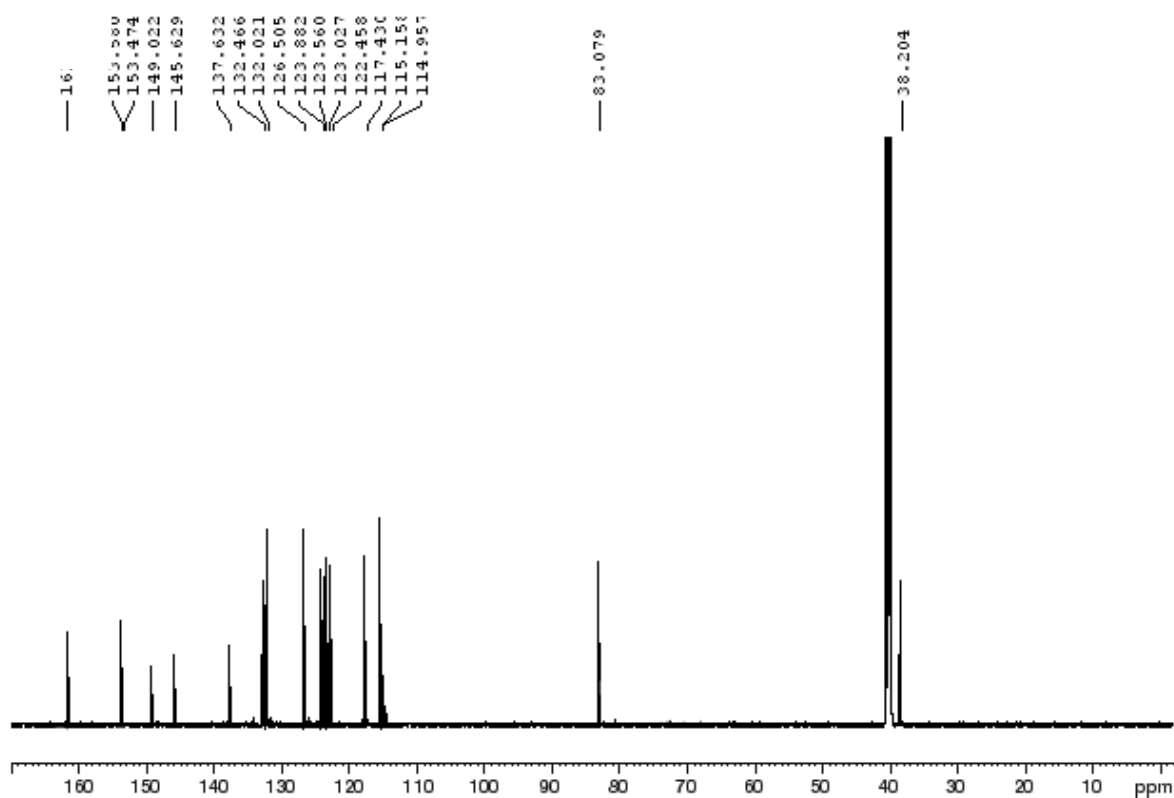

<sup>1</sup>H-NMR ((CD<sub>3</sub>)<sub>2</sub>SO, 500 MHz) of compound 9i.

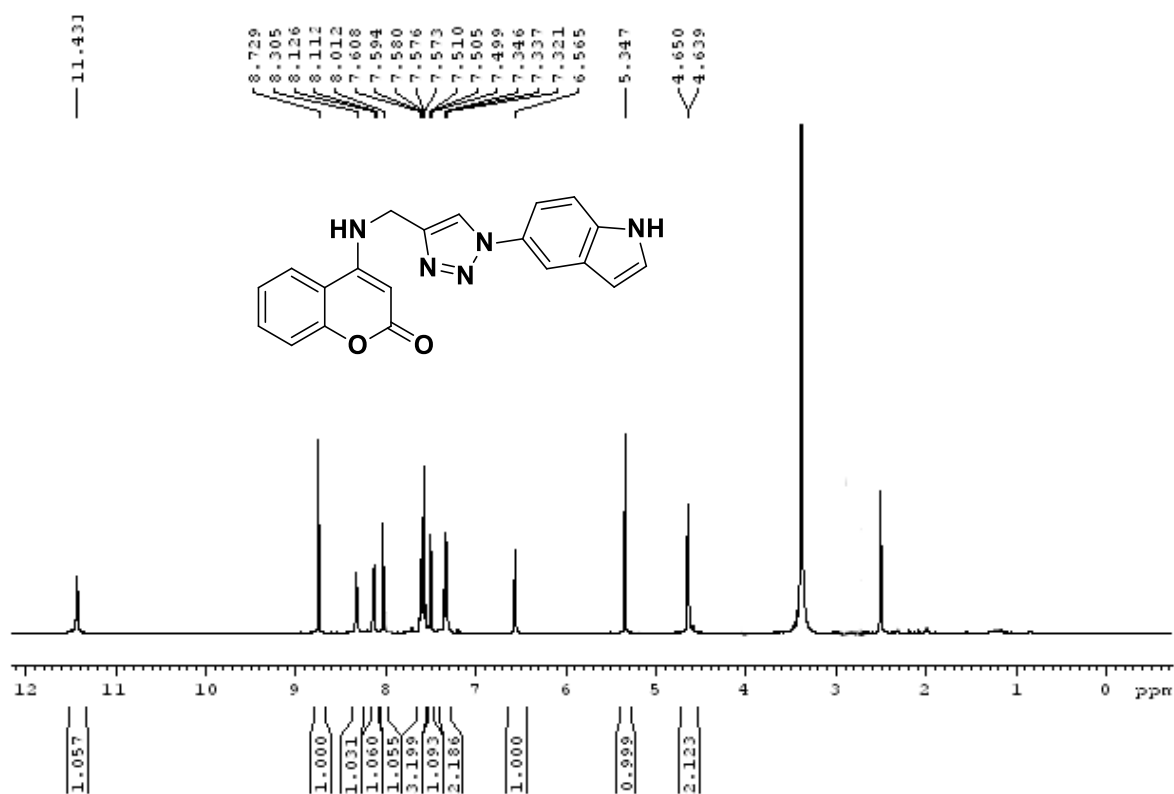

<sup>13</sup>C-NMR ((CD<sub>3</sub>)<sub>2</sub>SO, 125 MHz) of compound 9i.

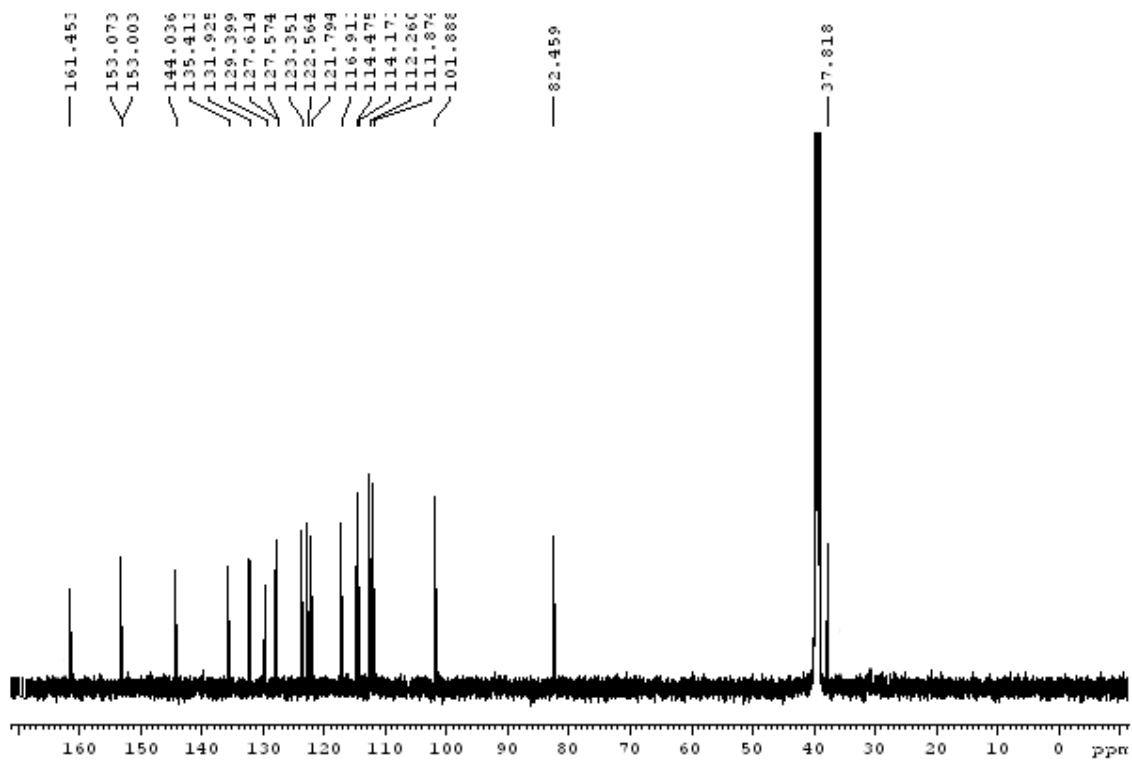



<sup>1</sup>H-NMR ((CD<sub>3</sub>)<sub>2</sub>SO, 500 MHz) of compound 9j.

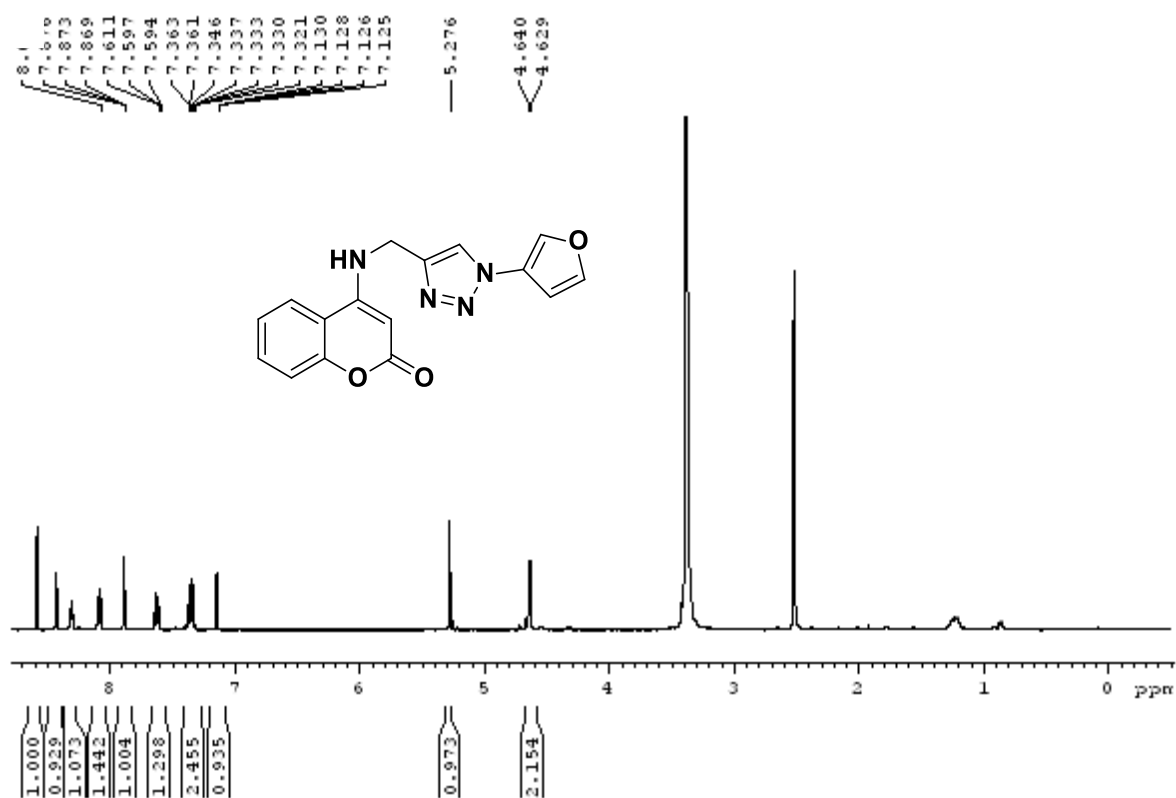

<sup>13</sup>C-NMR ((CD<sub>3</sub>)<sub>2</sub>SO, 125 MHz) of compound 9j.

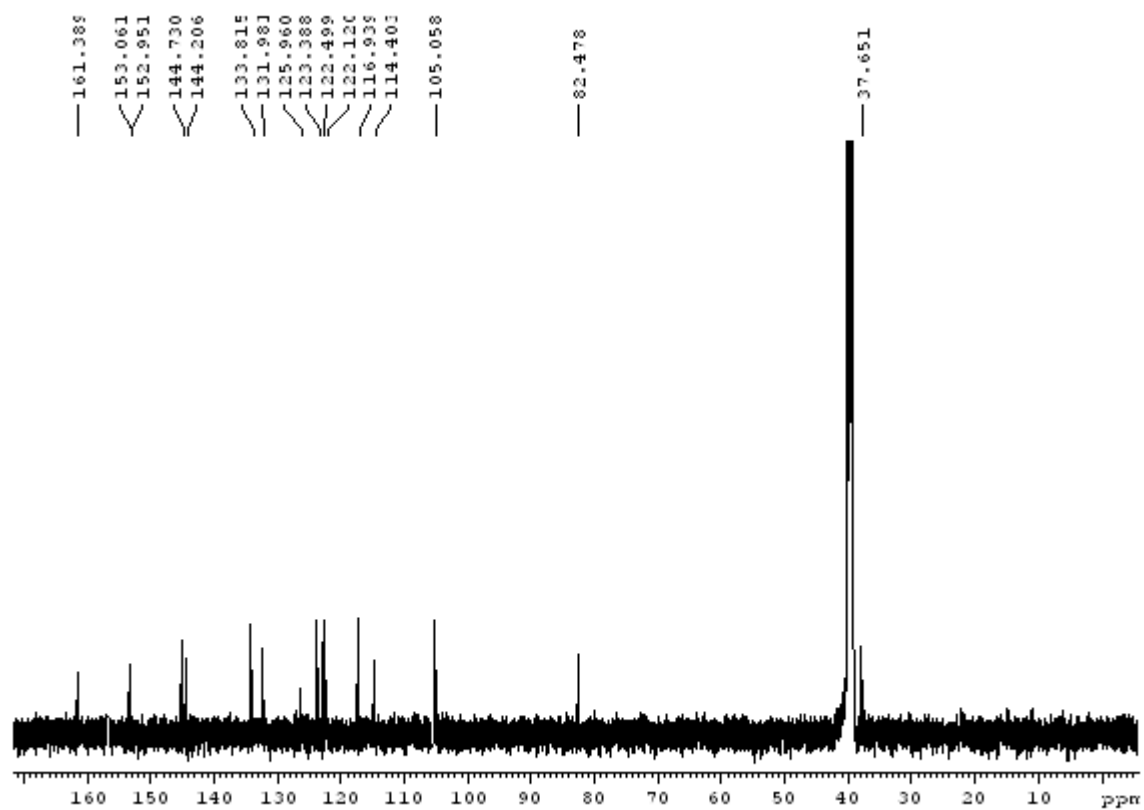

**<sup>1</sup>H-NMR ((CD<sub>3</sub>)<sub>2</sub>SO, 500 MHz) of compound 9k.**

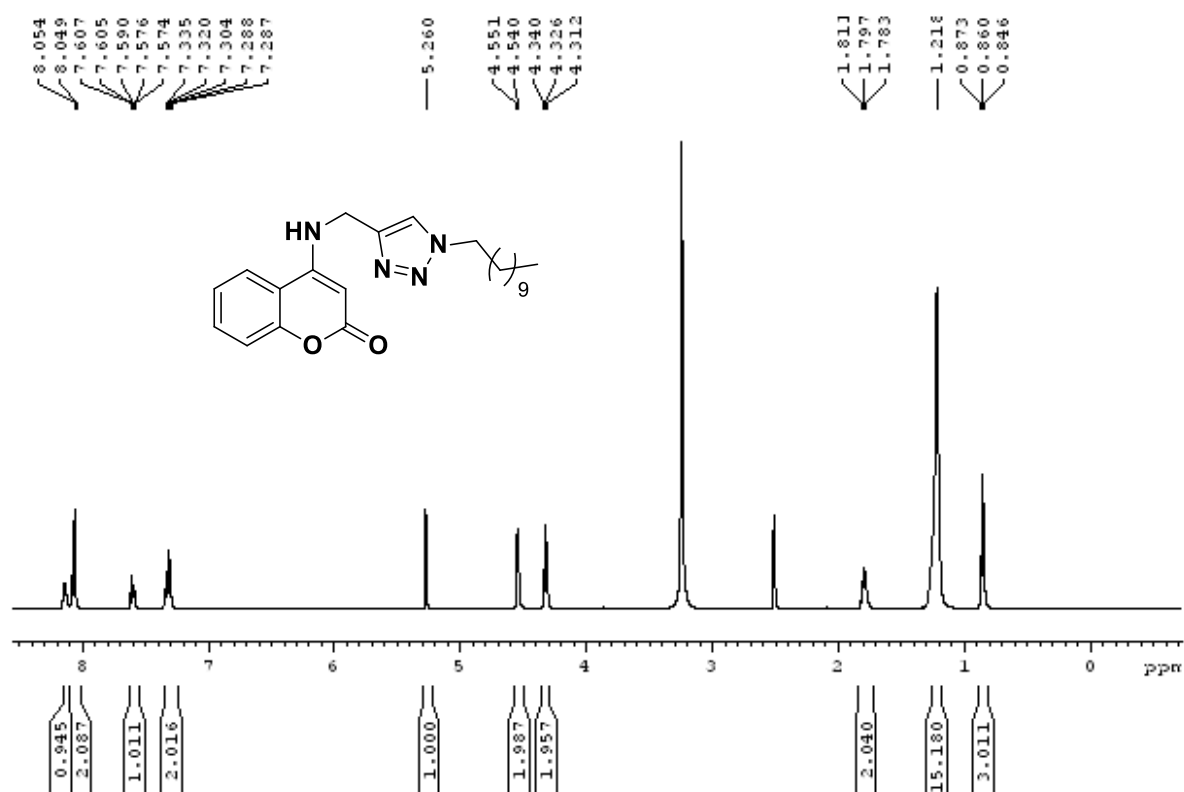

**<sup>13</sup>C-NMR ((CD<sub>3</sub>)<sub>2</sub>SO, 125 MHz) of compound 9k.**

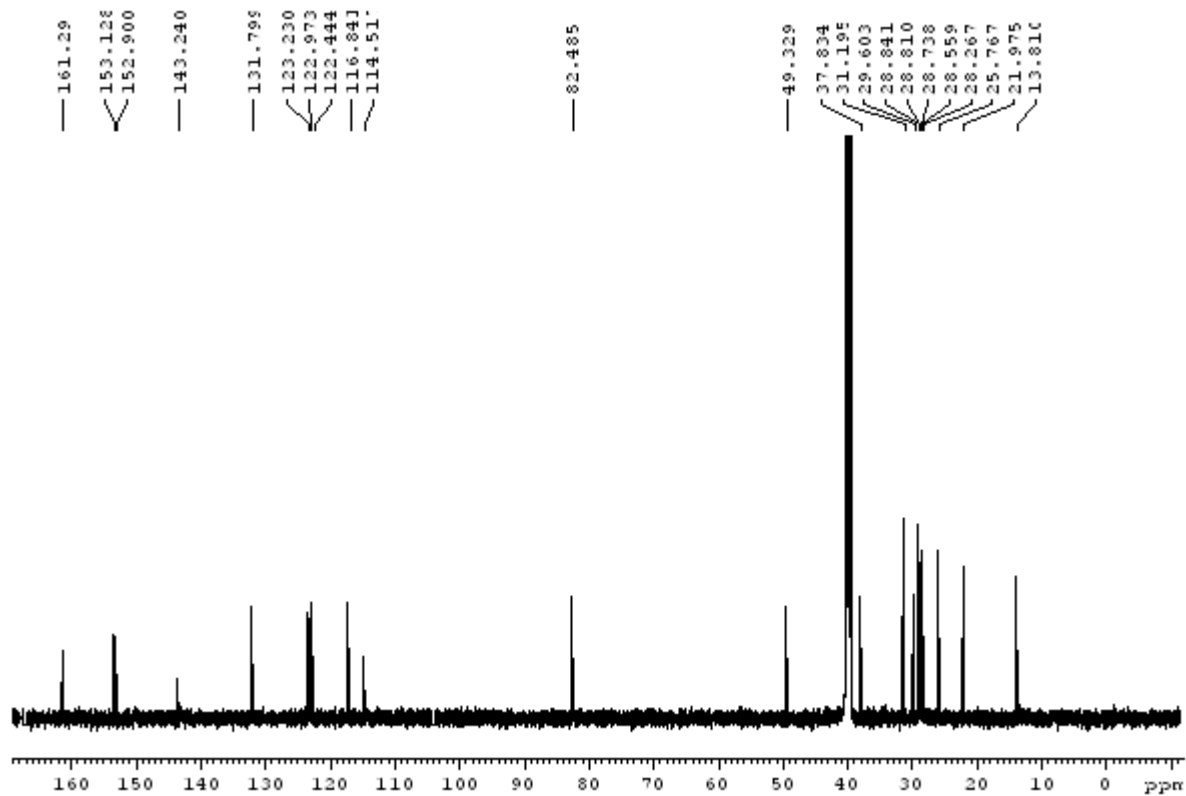

**<sup>1</sup>H-NMR ((CD<sub>3</sub>)<sub>2</sub>SO, 500 MHz) of compound 9l.**

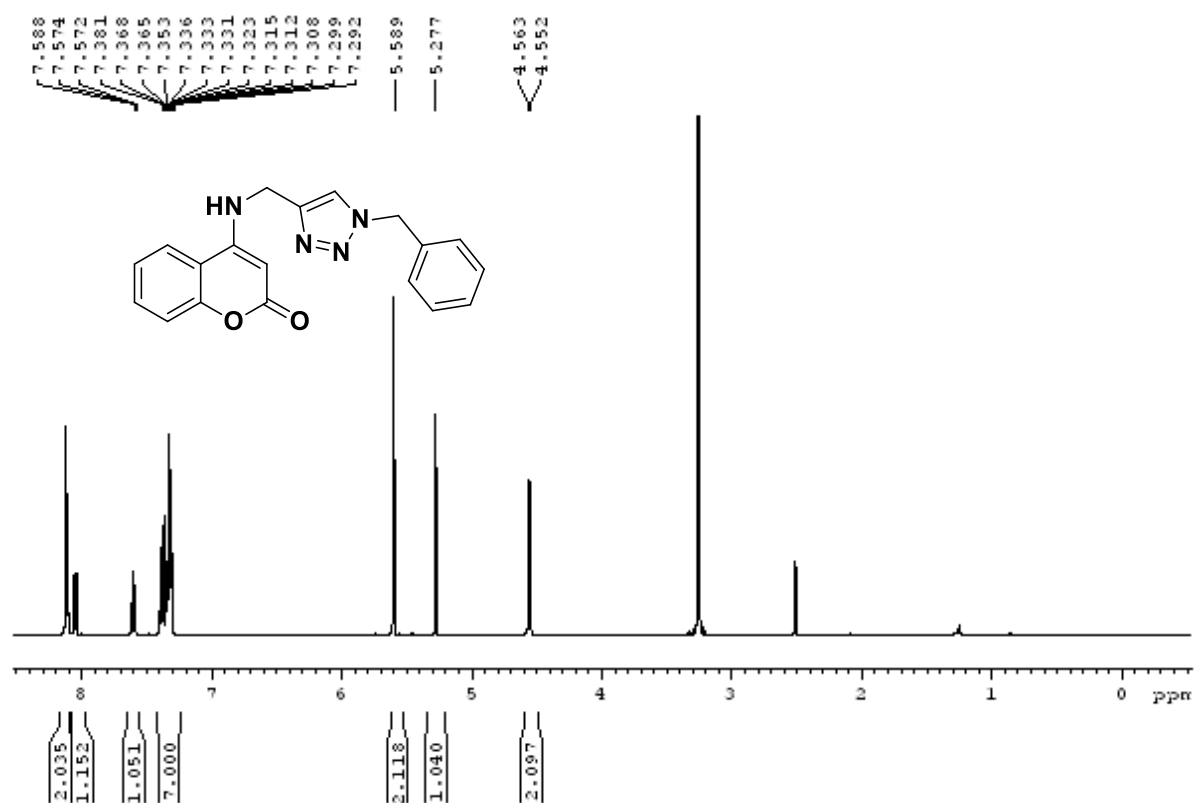

**<sup>13</sup>C-NMR ((CD<sub>3</sub>)<sub>2</sub>SO, 125 MHz) of compound 9l.**

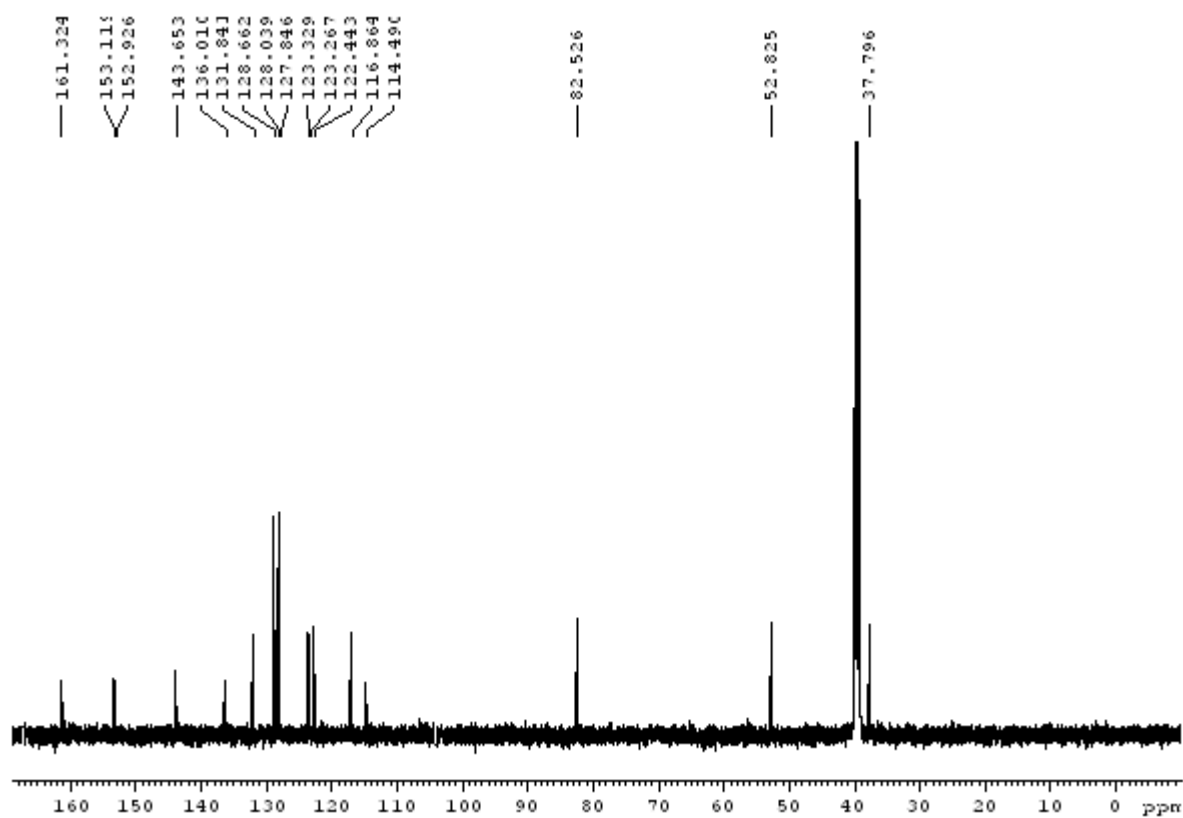

<sup>1</sup>H-NMR ((CD<sub>3</sub>)<sub>2</sub>SO, 500 MHz) of compound 9m.

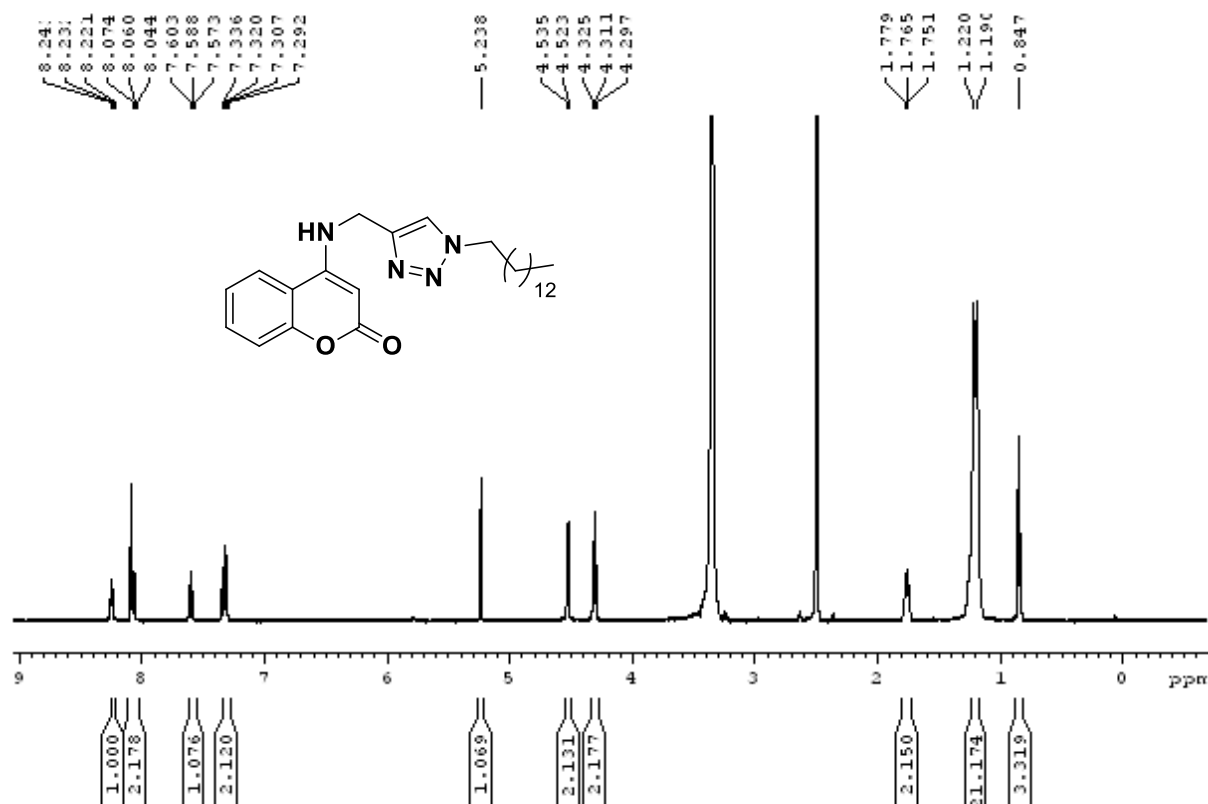

<sup>13</sup>C-NMR ((CD<sub>3</sub>)<sub>2</sub>SO, 150 MHz) of compound 9m.

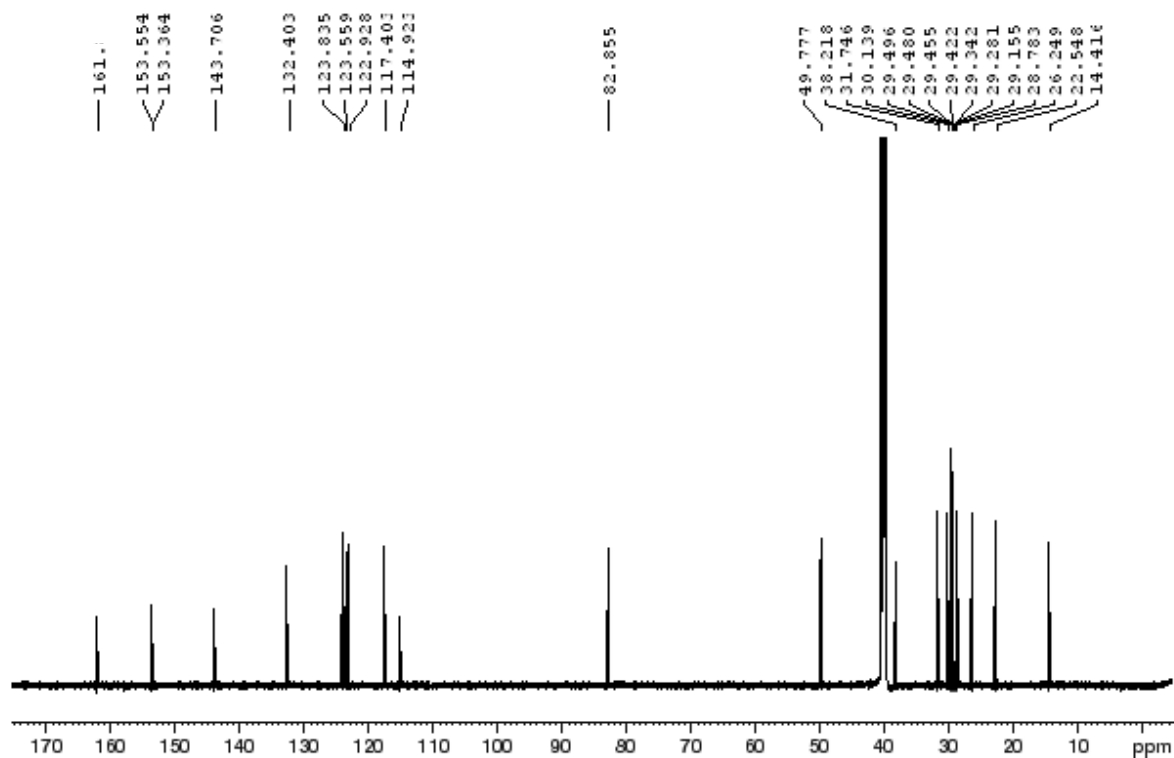

Supplement: molecules-23-00199-s001.pdf [file molecules-23-00199-s001.pdf]
